# Supplementary material for: Computational study revealed a “pull–push” radical transfer mechanism of Mmp10-catalyzed Cδ-methylation of arginine
Source: Royal Society of Chemistry journal article supplement (doi:10.1039/d2cc02052a), 2022-01-01
Supplement: d2cc02052a1.pdf [file d2cc02052a1.pdf]

---

**Supporting information to:**

**Computational Study revealed a “Pull-Push” Radical Transfer  
Mechanism of Mmp10-Catalyzed C<sub>5</sub>-methylation of Arginine**

Wen-Hao Deng, and Rong-Zhen Liao\*

Key Laboratory of Material Chemistry for Energy Conversion and Storage, Ministry of Education, Hubei Key Laboratory of Bioinorganic Chemistry and Materia Medica, Hubei Key Laboratory of Materials Chemistry and Service Failure, School of Chemistry and Chemical Engineering, Huazhong University of Science and Technology, Wuhan 430074, P. R. China.

E-mail: rongzhen@hust.edu.cn

---

**Contents**

|                                                   |     |
|---------------------------------------------------|-----|
| S1. Computational details                         | S3  |
| S2. Tables, Figures and Schemes                   | S6  |
| S3. Energies for all stationary points            | S14 |
| S4. Cartesian Coordinates of Optimized Structures | S15 |
| S5. References                                    | S78 |

---

## S1. Computational details

The quantum chemical cluster calculations were performed using the density functional B3LYP-D3<sup>S1</sup> (with the default D3 dispersion correction<sup>S2</sup> as proposed by Grimme) as implemented in the Gaussian 16 program.<sup>S3</sup> All geometries were optimized using the 6-31G(d,p) basis sets for the C, N, O, H elements, while the SDD pseudopotential<sup>S4a</sup> and its corresponding basis sets for Co (**BS1**). On the basis of these optimized geometries, more accurate energies were obtained by performing single-point calculations using the 6-311+G(2d,2p) basis sets for all atoms except Co, for which the revised SDD<sup>S4</sup> (with *2f* and *1g* polarized functions) was used (**BS2**). To evaluate the sensitivity of the results to the choice of density functional, single-point calculations were carried out using the hybrid meta-GGA functional MN15<sup>S5</sup> based on the B3LYP-D3 geometries. Both methods gave quite similar barriers and reaction energies.

Analytic frequency calculations were done at the same theory level as the geometry optimizations to obtain the zero-point energies (ZPE) and to confirm the nature of various stationary points. As shown in **Figure 2**, a number of atoms at the boundary of the model were kept frozen during the geometry optimization. This coordinate locking scheme leads to a few small imaginary frequencies, which contribute little to the ZPE and thus can be disregarded.

The solvation effects of the enzyme environment were calculated as single points at the same theory level as the geometry optimizations using the SMD<sup>S6</sup> solvation model method. The dielectric constant was chosen to be 4, which is commonly used in the modeling of protein surroundings. For comparison, a dielectric constant of 80 (water) was also used, and it gave very similar results (**Figure S5**), with a root-mean-squared deviation (RMSD) of 0.6 kcal/mol.

The principal interacting orbital (PIO) analysis<sup>S7</sup> was performed using the B3LYP-D3 wavefunctions and the publicly available code on Github, combined with the natural population analysis carried out by the NBO 7.0 package.<sup>S8</sup>

---

**Basis sets used for geometry optimization (BS1, in Gaussian format).**

Co  
SDD  
\*\*\*\*  
C N O H  
6-31g(d,p)  
\*\*\*\*

Co  
SDD

**Basis sets used for single single-point calculations (BS2, in Gaussian format).**

Co 0  
S 3 1.00  
20.9080010 0.3980530  
13.9062340 -0.6490520  
7.3285430 -0.7234530  
S 1 1.00  
2.1363240 1.0  
S 1 1.00  
0.8528220 1.0  
S 1 1.00  
0.1066920 1.0  
S 1 1.00  
0.0393460 1.0  
S 1 1.00  
0.0100000 1.0  
P 2 1.00  
67.0344430 0.0293700  
13.2623340 -1.0136260  
P 2 1.00  
5.6906500 0.2038650  
2.2719400 0.8336450  
P 1 1.00  
0.7889110 1.0  
P 1 1.00  
0.1183550 1.0  
P 1 1.00  
0.0305940 1.0  
D 4 1.00  
36.8405200 0.0380560  
11.1736750 0.1889250  
3.7975640 0.4410510

---

1.2392620 0.5656970

D 1 1.00

0.3394000 1.0

D 1 1.00

0.0900000 1.0

F 1 1.00

4.0760000 1.0

F 1 1.00

1.0190000 1.0

G 1 1.00

2. 7110000 1.0

\*\*\*\*

C N O H 6-311+G(2d,2p)

\*\*\*\*

Co

SDD

---

## S2. Tables, Figures, and Schemes

**Table S1.** Calculated Mulliken spin populations on key atoms of various stationary points.

| Entry | Complex | Spin population |      |       |      |      |
|-------|---------|-----------------|------|-------|------|------|
|       |         | C1              | C2   | C3    | C4   | Co   |
| 1     | React   | 1.06            | 0.00 | 0.00  | 0.00 | 0.00 |
| 2     | TS1     | 0.59            | 0.44 | 0.00  | 0.00 | 0.00 |
| 3     | Int1    | 0.00            | 0.84 | 0.00  | 0.00 | 0.01 |
| 4     | TS2     | 0.00            | 0.61 | -0.47 | 0.00 | 0.80 |
| 5     | TS2'    | 0.00            | 0.37 | 0.00  | 0.52 | 0.00 |
| 6     | Int2'   | 0.00            | 0.00 | 0.00  | 0.96 | 0.00 |
| 7     | TS3'    | 0.00            | 0.01 | -0.46 | 0.79 | 0.76 |
| 8     | Prod    | 0.00            | 0.00 | 0.00  | 0.00 | 1.10 |
| 9     | Prod'   | 0.00            | 0.00 | 0.00  | 0.00 | 1.10 |

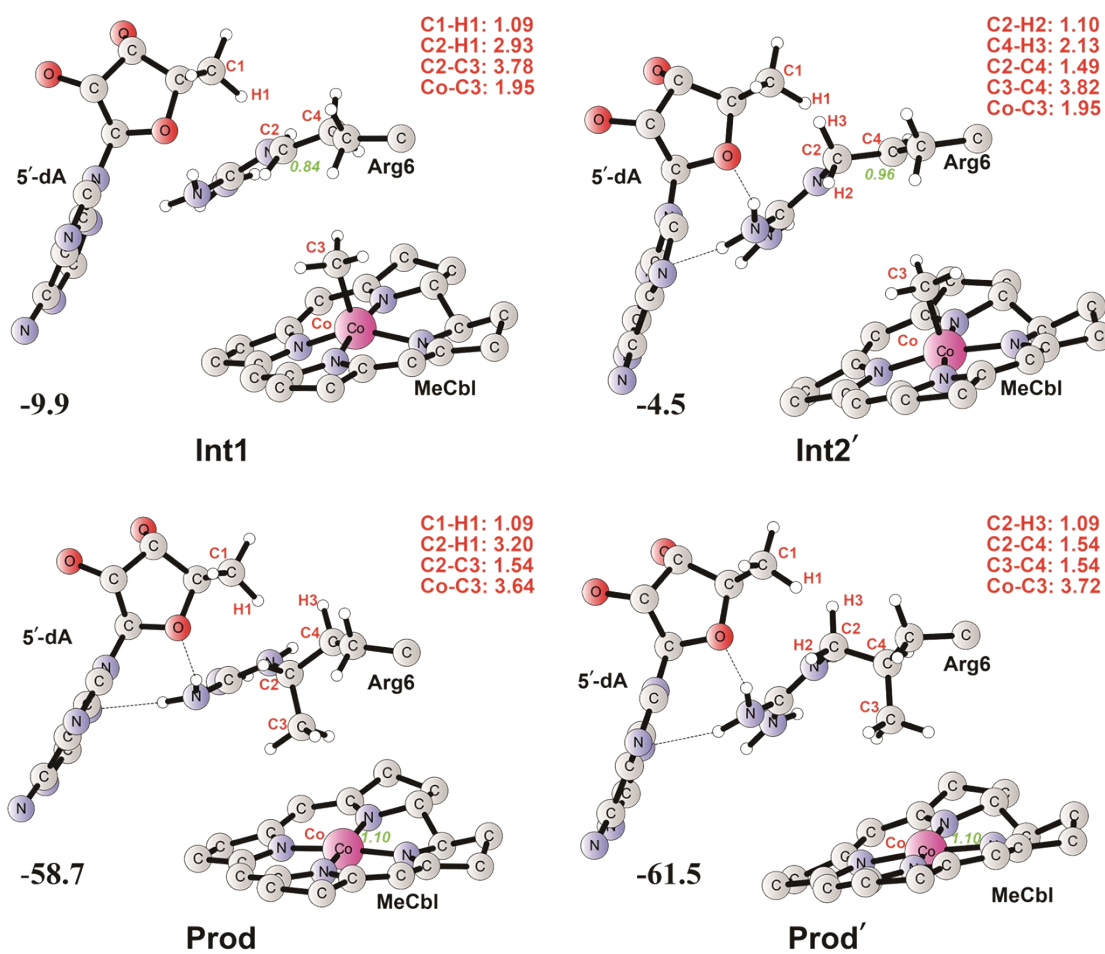

Fig. S1 Optimized structures of intermediates and products.

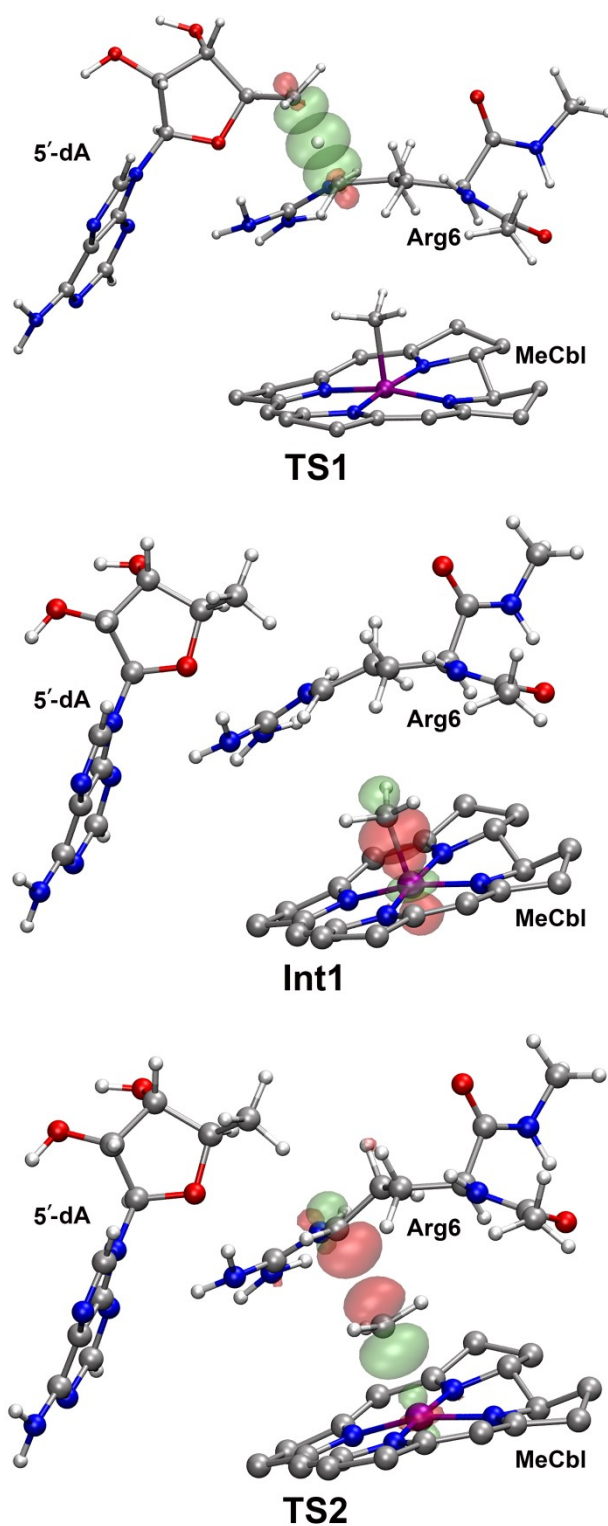

**Fig. S2** PISO analysis on **TS1**, **Int1**, and **TS2**. For **TS1**, the two fragments are the transferred hydrogen atom and the rest of the model. For **Int1** and **TS2**, the two fragments are the transferred methyl group (CH<sub>3</sub>) and the rest of the model. The  $\alpha$ -PISOs are presented as the  $\beta$ -PISOs are very similar. The first  $\alpha$ -PISO and  $\beta$ -PISO have an overall contribution of 99.4%, 92.0%, and 91.0%, respectively, for **TS1**, **Int1**, and **TS2**, respectively. These suggested that these orbitals captured most of the interactions.



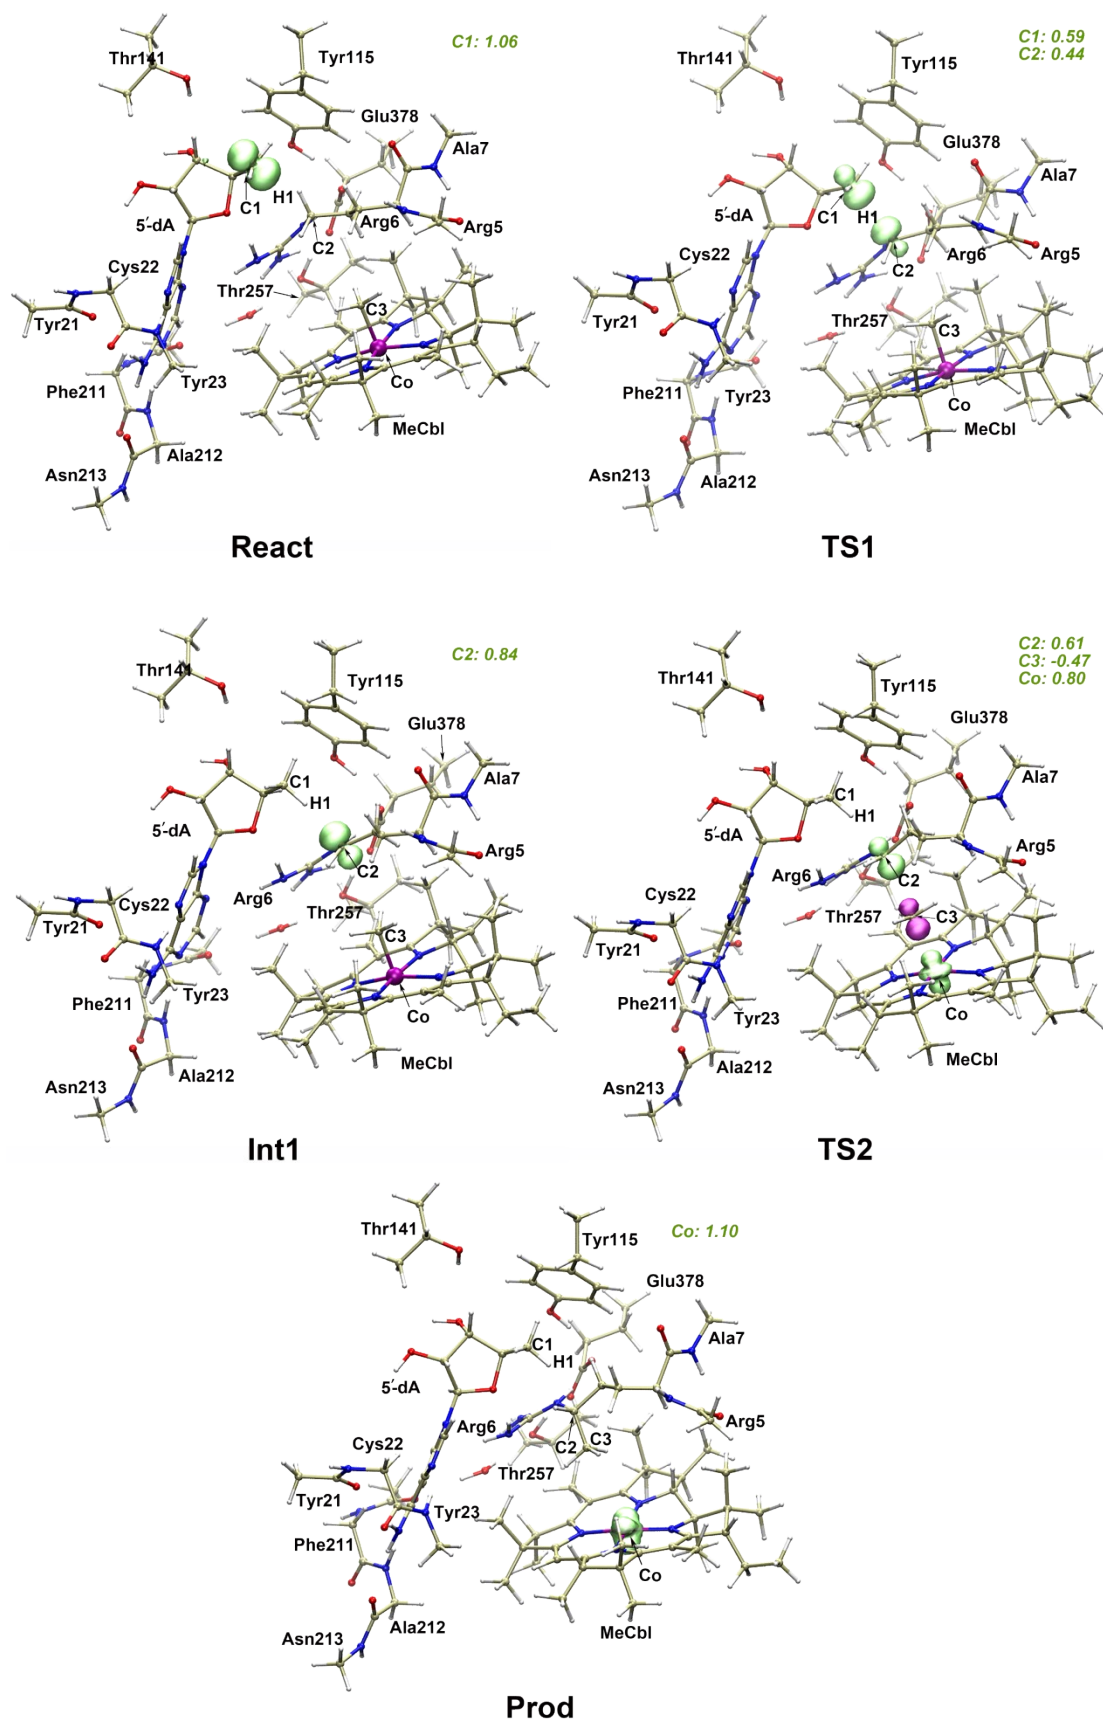

Fig. S3 Plots of Mulliken spin density in various stationary points.

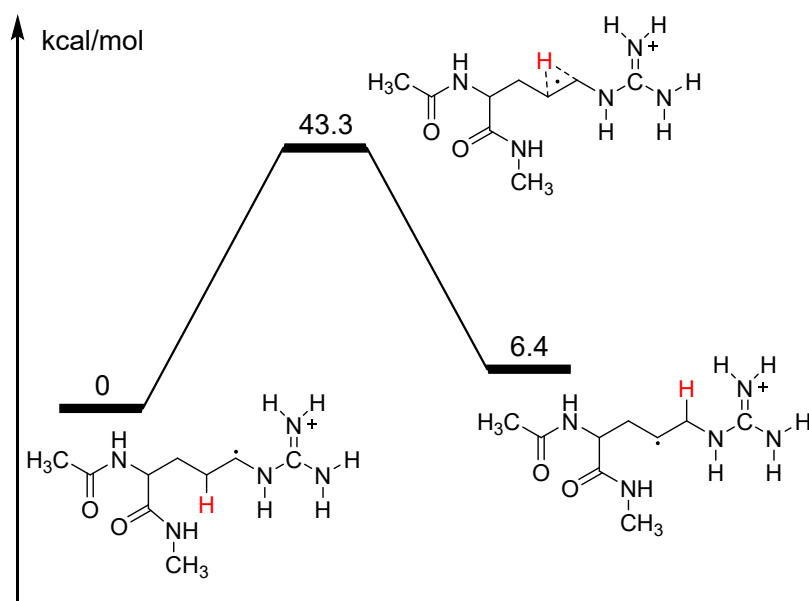

**Fig. S4** Energy diagram (in kcal/mol) for 1,2-hydrogen shift step of C<sub>6</sub>-centered radical arginine at the B3LYP-D3/6-311+G(2d,2p) level.

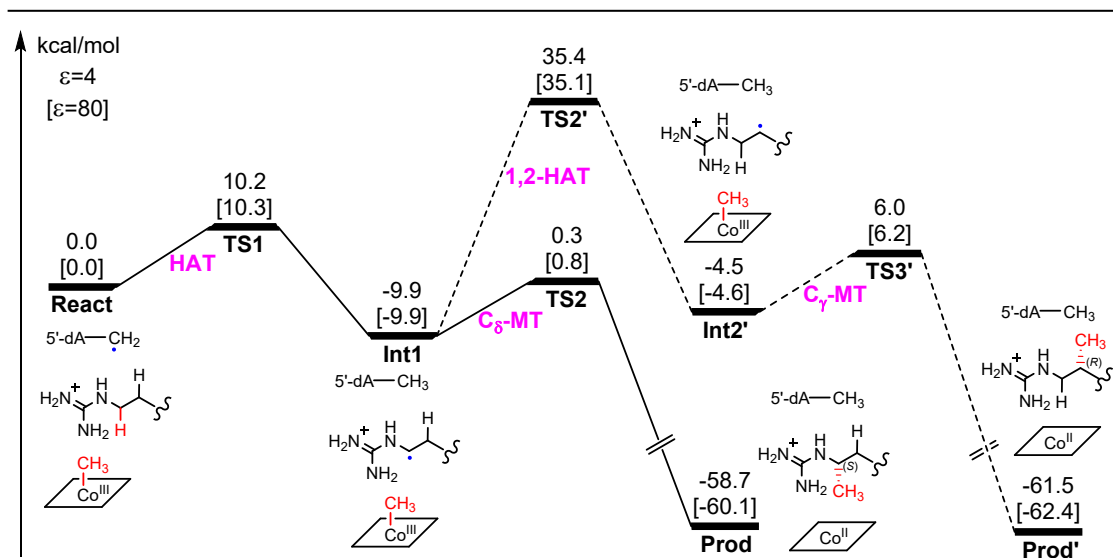

**Fig. S5** Energy diagram (in kcal/mol) at the B3LYP-D3 level using two different dielectric constants ( $\epsilon=4$  and  $\epsilon=80$ ) to model the solvation effects.

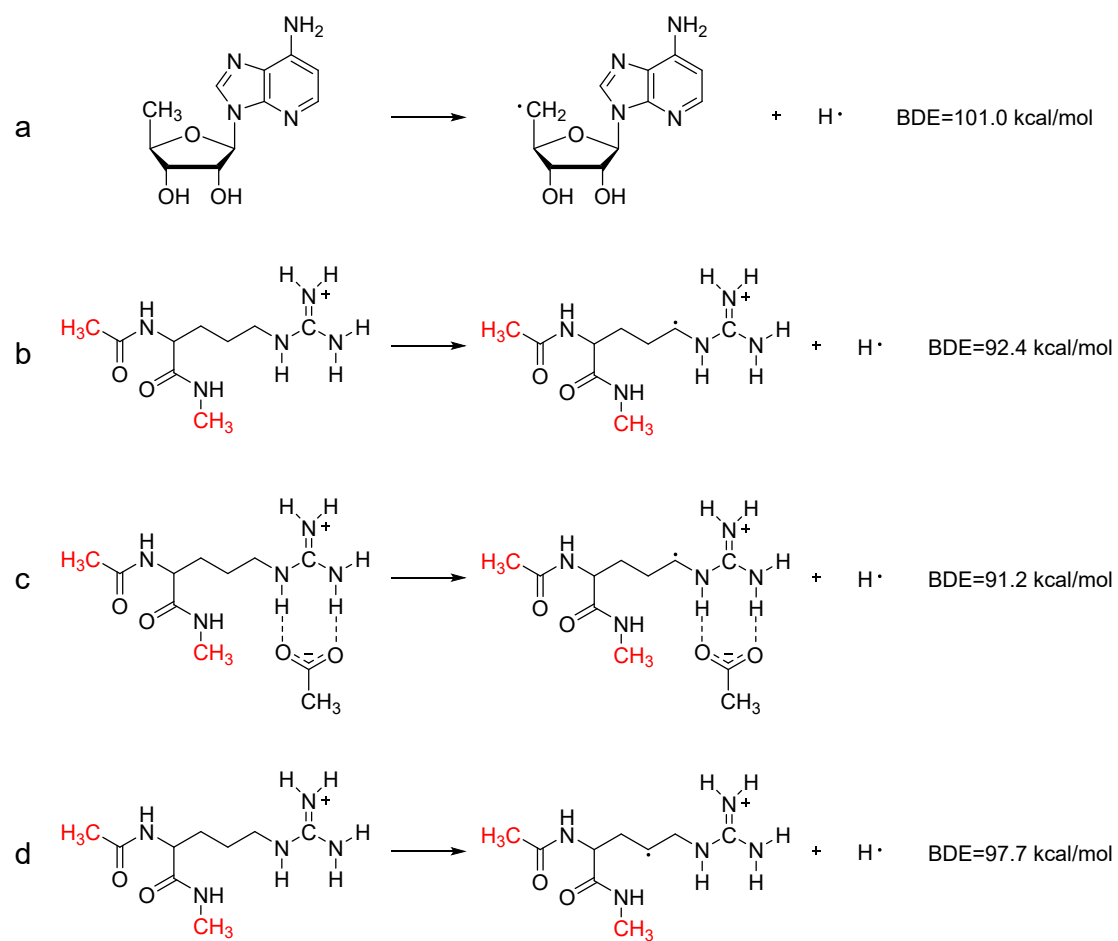

**Scheme S1.** Bond dissociation energies of 5'-deoxyadenosine (a) and arginine (b, c, and d). All calculations were carried out at the B3LYP-D3/6-311+G(2d,2p) level. The present energies include zero-point energy corrections.

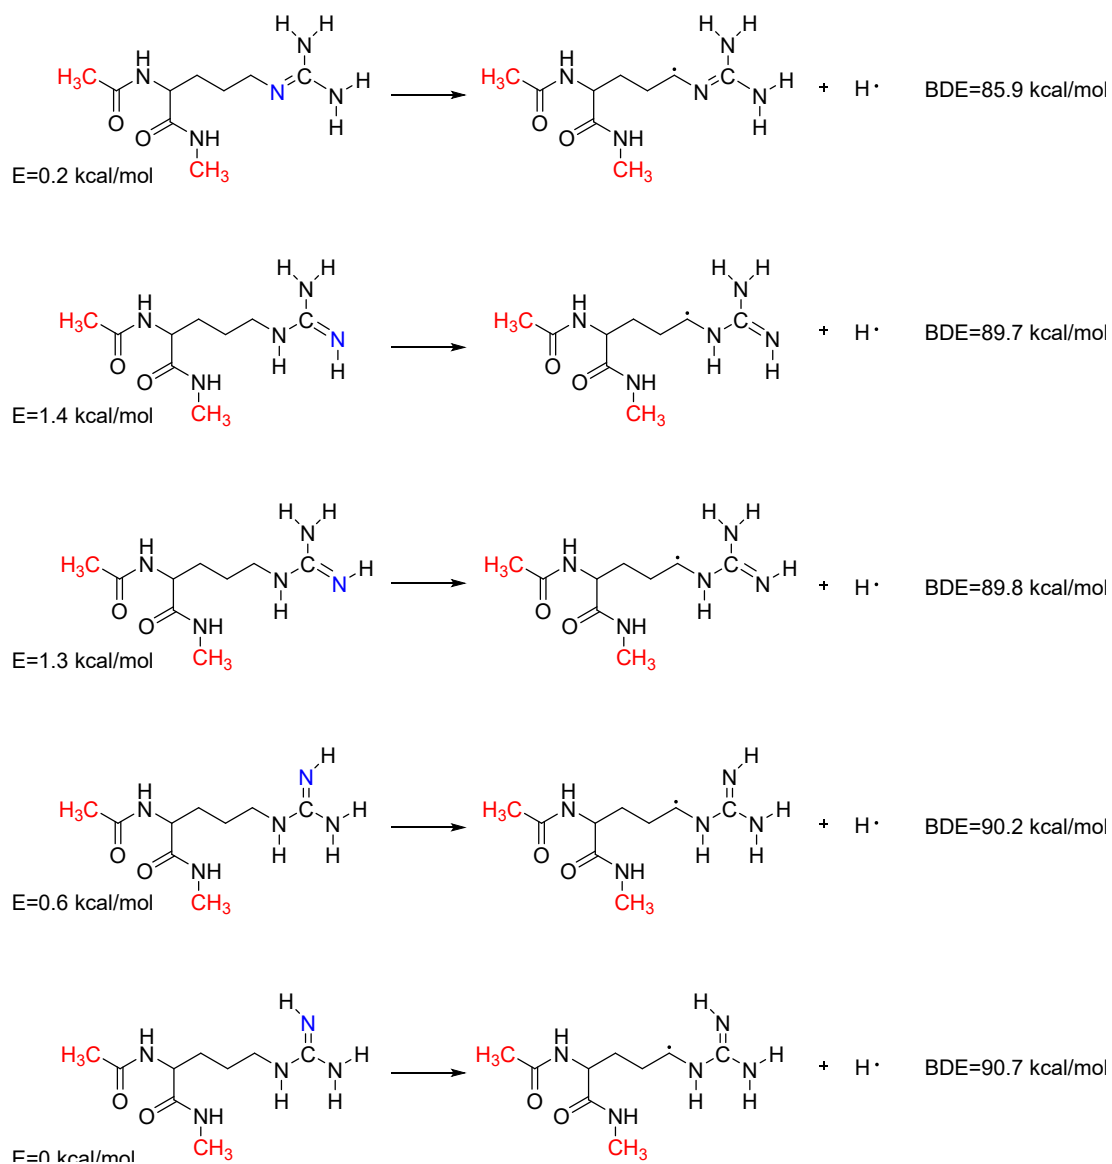

**Scheme S2.** Bond dissociation energies of arginine in different protonated states. Relative energies of different protonated arginines are shown on the left side. All calculations were carried out at the B3LYP-D3/6-311+G(2d,2p) level. The present energies include zero-point energy corrections.

### S3. Energies for all stationary points

**Table S2.** Calculated energies (in Hartree) for all stationary points.

|                                      | optimization | solvation   | large basis sets | ZPE     |
|--------------------------------------|--------------|-------------|------------------|---------|
| <b><sup>2</sup>React<sup>a</sup></b> | -5717.34136  | -5717.41484 | -5718.99724      | 2.31022 |
| <b><sup>4</sup>React</b>             | -5717.30652  | -5717.37981 | -5718.96315      | 2.30775 |
| <b><sup>2</sup>TS1</b>               | -5717.32335  | -5717.39771 | -5718.97691      | 2.30704 |
| <b><sup>2</sup>Int1</b>              | -5717.35830  | -5717.43155 | -5719.01359      | 2.31059 |
| <b><sup>4</sup>Int1</b>              | -5717.32314  | -5717.39612 | -5718.97929      | 2.30771 |
| <b><sup>2</sup>TS2</b>               | -5717.34259  | -5717.41445 | -5718.99721      | 2.30901 |
| <b><sup>2</sup>TS2'</b>              | -5717.27922  | -5717.35321 | -5718.93543      | 2.30531 |
| <b><sup>2</sup>Int2'</b>             | -5717.34801  | -5717.42230 | -5719.00365      | 2.31033 |
| <b><sup>2</sup>TS3'</b>              | -5717.33126  | -5717.40411 | -5718.98647      | 2.30836 |
| <b><sup>2</sup>Prod</b>              | -5717.43895  | -5717.51642 | -5719.09252      | 2.31598 |
| <b><sup>4</sup>Prod</b>              | -5717.38884  | -5717.47021 | -5719.04231      | 2.31272 |
| <b><sup>2</sup>Prod'</b>             | -5717.443577 | -5717.52189 | -5719.09706      | 2.31683 |

<sup>a</sup>The superscript shown in the left indicates the multiplicity.

---

## S5. Cartesian Coordinates of Optimized Structures

| React |              |             |             |
|-------|--------------|-------------|-------------|
| C     | -14.82269000 | 30.21609000 | 19.63219300 |
| C     | -14.43410500 | 28.90462500 | 19.06747600 |
| O     | -13.77564400 | 29.14331700 | 17.77164200 |
| C     | -13.41425200 | 28.06640400 | 19.90171900 |
| O     | -13.83073800 | 26.70563100 | 19.89436700 |
| C     | -12.11353100 | 28.22298000 | 19.09921200 |
| O     | -11.25445500 | 27.13980800 | 19.37187000 |
| C     | -12.65789500 | 28.27353600 | 17.66106600 |
| N     | -11.74362400 | 28.78148600 | 16.66143400 |
| C     | -10.93289600 | 29.90306700 | 16.74158000 |
| N     | -10.18243200 | 30.07831500 | 15.68266700 |
| C     | -10.50403600 | 29.02618000 | 14.83587000 |
| C     | -10.01717000 | 28.61652800 | 13.56256500 |
| N     | -8.98716400  | 29.21884800 | 12.94510700 |
| N     | -10.65622500 | 27.58283100 | 12.95548700 |
| C     | -11.66349400 | 26.96173400 | 13.59504300 |
| N     | -12.13809900 | 27.20445000 | 14.82547000 |
| C     | -11.50686800 | 28.23763500 | 15.40406100 |
| Co    | -17.67795700 | 32.29364400 | 11.49018400 |
| N     | -19.01623600 | 33.61178100 | 11.45070700 |
| N     | -16.35182700 | 33.67156000 | 11.27308200 |
| N     | -16.53751900 | 30.79437700 | 11.08783900 |
| N     | -19.12029600 | 31.13850800 | 11.73520000 |
| C     | -20.41955600 | 33.11968000 | 11.35708000 |
| C     | -20.71569400 | 32.79898200 | 9.87944900  |
| C     | -21.25217400 | 34.33087500 | 11.91826500 |
| C     | -22.69160700 | 34.41535500 | 11.39547200 |
| C     | -21.29581600 | 34.31293000 | 13.45740300 |
| C     | -20.33974300 | 35.54397600 | 11.50745700 |
| C     | -20.66539800 | 36.28988500 | 10.17408100 |
| C     | -21.41505300 | 37.59495700 | 10.46007400 |
| C     | -18.96281700 | 34.91128300 | 11.52458600 |
| C     | -17.74227800 | 35.65945700 | 11.62805900 |
| C     | -17.90806100 | 37.14455300 | 11.88590300 |
| C     | -16.51953200 | 35.03986800 | 11.49523400 |
| C     | -15.16197800 | 35.76056500 | 11.44261300 |
| C     | -15.09154300 | 36.57128900 | 10.12682200 |
| C     | -14.82057800 | 36.65159600 | 12.65656900 |
| C     | -14.17383000 | 34.56164500 | 11.44788800 |
| C     | -12.96797000 | 34.68699800 | 10.53900900 |
| C     | -15.04139900 | 33.36582100 | 11.17704200 |

---

|   |              |             |             |
|---|--------------|-------------|-------------|
| C | -14.51052300 | 32.10371800 | 10.94989000 |
| C | -15.21234900 | 30.90354700 | 10.88384300 |
| C | -14.52987200 | 29.55093600 | 10.72830100 |
| C | -13.49168200 | 29.51627500 | 9.59696100  |
| C | -13.83246200 | 29.22165600 | 12.07059900 |
| C | -15.74981700 | 28.59538900 | 10.54430000 |
| C | -15.98497800 | 28.06001200 | 9.10498600  |
| C | -16.91191300 | 29.44878200 | 11.04971400 |
| C | -18.13936700 | 28.95305100 | 11.42666400 |
| C | -18.34539500 | 27.45449200 | 11.46696100 |
| C | -19.22708800 | 29.83793300 | 11.77861600 |
| C | -20.62135200 | 29.42631700 | 12.26939800 |
| C | -20.51501400 | 29.01366200 | 13.75129500 |
| C | -21.28304400 | 28.34595500 | 11.42204400 |
| C | -21.43088300 | 30.75299000 | 12.08545100 |
| C | -22.62114800 | 30.91728400 | 13.02962600 |
| C | -20.34910300 | 31.82296200 | 12.19136000 |
| C | -17.29917500 | 32.26144700 | 13.40197400 |
| C | -19.36770900 | 32.90910600 | 17.07434100 |
| C | -18.09706900 | 32.05491900 | 17.11841600 |
| C | -18.32740500 | 30.62038600 | 16.65095400 |
| C | -17.04791500 | 29.79009600 | 16.77179100 |
| N | -17.21447100 | 28.51288500 | 16.09172500 |
| C | -16.29078900 | 27.90214200 | 15.34324600 |
| N | -15.01765000 | 28.37696400 | 15.29343600 |
| N | -16.63714900 | 26.84871300 | 14.61293400 |
| C | -5.10613400  | 28.26183200 | 16.21419300 |
| C | -6.21179200  | 29.33529600 | 16.14433900 |
| O | -7.18834900  | 29.17016800 | 15.41100800 |
| N | -6.09131600  | 30.44995100 | 16.92722900 |
| C | -7.09804400  | 31.52495400 | 16.91200100 |
| C | -7.10855800  | 32.29923500 | 15.56745500 |
| O | -6.08850400  | 32.82214000 | 15.13739600 |
| N | -8.32594700  | 32.38014200 | 14.96017100 |
| C | -8.47604800  | 33.01601500 | 13.65200000 |
| C | -17.87842300 | 30.28504100 | 24.18704100 |
| C | -17.50476700 | 30.63336400 | 22.72019900 |
| C | -17.76884200 | 29.54335200 | 21.70080300 |
| C | -17.00287000 | 28.36316900 | 21.71728100 |
| C | -18.72893900 | 29.68703500 | 20.69241600 |
| C | -17.17791600 | 27.37208900 | 20.75528000 |
| C | -18.92648800 | 28.69243100 | 19.72990400 |
| C | -18.14380400 | 27.52836600 | 19.74759500 |
| O | -18.27114900 | 26.54228400 | 18.82666500 |



---

|   |              |             |             |
|---|--------------|-------------|-------------|
| C | -13.71991800 | 25.19936600 | 24.47683000 |
| C | -13.12273200 | 26.35559600 | 23.66402700 |
| O | -14.11766400 | 27.07747300 | 22.92774300 |
| C | -12.01285700 | 25.86057000 | 22.73062000 |
| C | -13.22503500 | 22.26107200 | 11.26005000 |
| C | -12.27837600 | 23.43648000 | 11.45451900 |
| O | -12.72465700 | 24.54983500 | 11.76297600 |
| N | -10.95009000 | 23.18897500 | 11.30998200 |
| C | -9.92401700  | 24.22799900 | 11.39697800 |
| C | -9.79696600  | 24.98658400 | 10.06904400 |
| O | -9.54051900  | 24.37874500 | 9.03280000  |
| N | -10.00145400 | 26.32715100 | 10.13869900 |
| C | -9.78101600  | 27.15299200 | 8.96402200  |
| C | -8.40366200  | 27.79115700 | 8.99815900  |
| O | -7.99173800  | 28.39512600 | 9.99005500  |
| N | -7.72051700  | 27.64945100 | 7.83974300  |
| C | -6.37599100  | 28.13600200 | 7.66100000  |
| C | -19.32865900 | 22.74722800 | 11.65441700 |
| C | -19.54801700 | 24.19738400 | 12.05639900 |
| O | -18.42382900 | 24.60024000 | 12.84792100 |
| C | -20.88386900 | 24.37859400 | 12.77858000 |
| C | -23.26170800 | 24.64413100 | 16.90937600 |
| C | -22.27886500 | 25.80843300 | 16.71756500 |
| C | -20.87238600 | 25.27474900 | 16.37957200 |
| C | -19.88838600 | 26.33906400 | 15.91446900 |
| O | -19.67584400 | 27.33729200 | 16.66942400 |
| O | -19.30987500 | 26.18870100 | 14.79400100 |
| O | -15.51324000 | 25.55932500 | 12.36573000 |
| H | -17.71835700 | 32.06112500 | 18.14783600 |
| H | -17.34459800 | 32.52735900 | 16.47440800 |
| H | -18.64897300 | 30.62371600 | 15.60449400 |
| H | -19.12507400 | 30.14178400 | 17.22673000 |
| H | -16.81444500 | 29.64444600 | 17.83208000 |
| H | -16.21563900 | 30.33586400 | 16.31554500 |
| H | -18.14283000 | 28.05942400 | 16.20153900 |
| H | -17.63471500 | 26.59833700 | 14.59211600 |
| H | -15.99620400 | 26.39772400 | 13.95612600 |
| H | -14.68332500 | 28.86003600 | 16.12525500 |
| H | -14.31482500 | 27.75870500 | 14.89615100 |
| H | -19.86899500 | 32.79471800 | 16.10715900 |
| H | -4.54703700  | 28.29157600 | 15.27389000 |
| H | -8.07499700  | 31.08347000 | 17.12450300 |
| H | -7.76790900  | 32.59841300 | 12.92660300 |
| H | -16.43125400 | 30.86575100 | 22.69157500 |

---

|   |              |             |             |
|---|--------------|-------------|-------------|
| H | -18.01698400 | 31.55185600 | 22.41263800 |
| H | -16.24030600 | 28.22324400 | 22.48063300 |
| H | -19.32541200 | 30.59301300 | 20.64020400 |
| H | -16.56886100 | 26.47375600 | 20.75106500 |
| H | -19.69516400 | 28.80090300 | 18.96973700 |
| H | -18.91017700 | 26.82212900 | 18.13222600 |
| H | -17.87696600 | 29.20155600 | 24.34088900 |
| H | -12.74529600 | 21.28336300 | 11.34036200 |
| H | -10.16562200 | 24.88897800 | 12.23113700 |
| H | -9.93506700  | 26.52585400 | 8.08408300  |
| H | -6.11221700  | 28.72180400 | 8.54263800  |
| H | -19.56781200 | 24.82083700 | 11.14683800 |
| H | -21.01019300 | 25.39988700 | 13.14420000 |
| H | -21.70807900 | 24.13902500 | 12.09913600 |
| H | -20.94743900 | 23.70266100 | 13.63753200 |
| H | -18.77128900 | 25.04054000 | 13.65212700 |
| H | -20.19843200 | 22.34017400 | 11.12709300 |
| H | -22.21637600 | 26.43015300 | 17.61661300 |
| H | -22.63031700 | 26.46485500 | 15.91047700 |
| H | -20.93630900 | 24.50030400 | 15.61313900 |
| H | -20.44594000 | 24.81017500 | 17.27855700 |
| H | -22.81831000 | 23.88124200 | 17.56131400 |
| H | -15.68545700 | 30.28626700 | 20.28207600 |
| H | -14.18365900 | 31.07699500 | 19.46994900 |
| H | -15.30985300 | 28.26357100 | 18.91416600 |
| H | -13.32796900 | 28.42797500 | 20.93132400 |
| H | -13.02679100 | 26.17113300 | 19.99140800 |
| H | -11.65227300 | 29.18994600 | 19.34686300 |
| H | -10.47810700 | 27.18851300 | 18.79876900 |
| H | -12.95095200 | 27.26659700 | 17.33955600 |
| H | -10.95689500 | 30.55789600 | 17.60086900 |
| H | -8.31299500  | 29.69164100 | 13.53792400 |
| H | -12.13872200 | 26.15663900 | 13.04147700 |
| H | -21.75029000 | 32.48153300 | 9.73481300  |
| H | -20.53499700 | 33.67211700 | 9.25108800  |
| H | -20.05761300 | 31.99739300 | 9.53363800  |
| H | -23.19834600 | 35.28117800 | 11.83173600 |
| H | -22.75960400 | 34.50356700 | 10.31043600 |
| H | -23.25995000 | 33.52803000 | 11.68623200 |
| H | -20.29845200 | 34.25127800 | 13.90036200 |
| H | -21.88636900 | 33.48030300 | 13.84555000 |
| H | -20.38568900 | 36.29211100 | 12.30546300 |
| H | -21.25970200 | 35.64916000 | 9.52082400  |
| H | -19.74182600 | 36.49462300 | 9.62116900  |

---

|   |              |             |             |
|---|--------------|-------------|-------------|
| H | -20.73319400 | 38.37155300 | 10.82302600 |
| H | -22.15175900 | 37.43304200 | 11.25572100 |
| H | -16.98254400 | 37.70159500 | 11.80861700 |
| H | -18.31109700 | 37.32343600 | 12.89017700 |
| H | -18.60503500 | 37.59801200 | 11.17830800 |
| H | -14.12065800 | 37.06264500 | 10.02238300 |
| H | -15.24740300 | 35.92827600 | 9.25562700  |
| H | -15.85851100 | 37.34697700 | 10.10329500 |
| H | -15.31797300 | 37.62113200 | 12.64756400 |
| H | -13.74266000 | 36.84758300 | 12.65622200 |
| H | -13.80823400 | 34.43307100 | 12.47779500 |
| H | -13.24701200 | 34.68463600 | 9.48266200  |
| H | -12.26573000 | 33.86382200 | 10.69822900 |
| H | -13.43381100 | 32.03738500 | 10.86406400 |
| H | -13.07359400 | 28.50851000 | 9.50763200  |
| H | -12.65991900 | 30.19373000 | 9.81288700  |
| H | -13.91722100 | 29.80098900 | 8.63164000  |
| H | -13.40339600 | 28.21772500 | 12.01798000 |
| H | -14.53935200 | 29.24901300 | 12.90461000 |
| H | -13.02257300 | 29.92673500 | 12.28336900 |
| H | -15.61800700 | 27.72223200 | 11.18998700 |
| H | -16.13795900 | 28.87450700 | 8.38971400  |
| H | -16.87064100 | 27.42140800 | 9.08580800  |
| H | -18.87229500 | 27.13957800 | 12.36628000 |
| H | -18.91955100 | 27.09654100 | 10.60605500 |
| H | -17.40189400 | 26.91523500 | 11.47816000 |
| H | -21.48565900 | 28.67869500 | 14.12808400 |
| H | -19.81529900 | 28.19283700 | 13.90059800 |
| H | -20.18612900 | 29.85147500 | 14.37034400 |
| H | -22.36397800 | 28.35789800 | 11.60207500 |
| H | -20.93878800 | 27.34013300 | 11.66079800 |
| H | -21.80597400 | 30.74546600 | 11.05595400 |
| H | -23.27580500 | 30.04160600 | 12.98698300 |
| H | -23.22561200 | 31.78541600 | 12.75811500 |
| H | -17.82816300 | 33.09428100 | 13.87294000 |
| H | -17.63379700 | 31.30503400 | 13.80445500 |
| H | -16.21937900 | 32.36278900 | 13.53388300 |
| H | -14.25321800 | 24.51102400 | 23.80990900 |
| H | -12.70016300 | 27.09604700 | 24.35443200 |
| H | -14.34467600 | 26.57149400 | 22.13237200 |
| H | -11.61804800 | 26.67608400 | 22.11770600 |
| H | -11.18497300 | 25.42105900 | 23.29574400 |
| H | -12.40000300 | 25.07993800 | 22.06181200 |
| H | -14.71054000 | 25.04653500 | 12.15998400 |

---

|   |              |             |             |
|---|--------------|-------------|-------------|
| H | -16.28501500 | 24.96563900 | 12.35049900 |
| H | -21.98165900 | 38.01288100 | 9.62785400  |
| H | -21.74813200 | 35.22967900 | 13.84117900 |
| H | -15.13040700 | 27.46326100 | 8.77824300  |
| H | -21.12493200 | 28.52127500 | 10.35286100 |
| H | -23.47828000 | 24.15770000 | 15.95166000 |
| H | -24.21108200 | 24.92071000 | 17.36831600 |
| H | -18.86333100 | 30.66571700 | 24.46889100 |
| H | -17.11634900 | 30.70396800 | 24.84478300 |
| H | -14.41281900 | 25.52108300 | 25.25446300 |
| H | -12.92057200 | 24.63109800 | 24.96636200 |
| H | -4.40180800  | 28.34688100 | 17.04160600 |
| H | -6.83965600  | 32.23216700 | 17.70273400 |
| H | -8.30686900  | 34.09229300 | 13.68539000 |
| H | -8.66402100  | 28.84245600 | 12.05521900 |
| H | -9.02771500  | 31.69217000 | 15.23397500 |
| H | -5.20184100  | 30.64301800 | 17.36233600 |
| H | -5.66396900  | 27.30810900 | 7.56745100  |
| H | -6.28902700  | 28.77004600 | 6.77866200  |
| H | -8.10200200  | 27.02842700 | 7.14207200  |
| H | -10.17104400 | 26.78073000 | 11.03946300 |
| H | -10.67883700 | 22.32365100 | 10.86612600 |
| H | -8.96604100  | 23.74266000 | 11.59778600 |
| H | -19.13190500 | 22.13852800 | 12.54138400 |
| H | -18.47637200 | 22.68897000 | 10.97732000 |
| H | -13.71756100 | 22.34474700 | 10.28651600 |
| H | -5.60515500  | 27.29197000 | 16.26642300 |
| H | -22.30180000 | 31.04312300 | 14.06825800 |
| H | -21.88367200 | 32.50904100 | 16.95883000 |
| H | -18.22294400 | 34.53566700 | 17.80081900 |
| H | -15.07145100 | 36.14871100 | 13.59595600 |
| H | -9.49310200  | 32.83115000 | 13.29852000 |
| H | -13.97956300 | 22.37743000 | 12.03786600 |
| H | -12.41837400 | 35.61059900 | 10.74517100 |
| H | -10.52178900 | 27.96158100 | 8.95232100  |
| H | -20.18311600 | 32.09520900 | 13.23902000 |
| C | -19.30590700 | 36.72590900 | 17.02009500 |
| C | -19.83877600 | 35.31838500 | 16.79811000 |
| O | -20.93290600 | 35.08666700 | 16.28838200 |
| N | -18.99829600 | 34.31590400 | 17.19143400 |
| C | -20.31227100 | 32.50619400 | 18.22897500 |
| O | -19.88346500 | 32.47010000 | 19.37844800 |
| N | -21.58869100 | 32.18877200 | 17.87118600 |
| C | -22.61800000 | 31.96697600 | 18.88104200 |

---

|   |              |             |             |
|---|--------------|-------------|-------------|
| H | -18.21841100 | 36.77827900 | 16.91548100 |
| H | -19.77629800 | 37.41034500 | 16.31381600 |
| H | -19.56706900 | 37.05863200 | 18.03132700 |
| H | -22.11728900 | 31.91378000 | 19.84862800 |
| H | -23.32051500 | 32.80797000 | 18.90368900 |
| H | -23.18855100 | 31.04875300 | 18.74201800 |

## TS1

|    |              |             |             |
|----|--------------|-------------|-------------|
| C  | -15.61199700 | 29.80883400 | 18.85407900 |
| C  | -14.74841000 | 28.61370100 | 18.61260200 |
| O  | -13.89936500 | 28.95443300 | 17.46158500 |
| C  | -13.74864900 | 28.14101900 | 19.71810900 |
| O  | -13.91033700 | 26.73944700 | 19.90813800 |
| C  | -12.36779600 | 28.42471000 | 19.08394000 |
| O  | -11.40993200 | 27.53562500 | 19.61294000 |
| C  | -12.68830800 | 28.23401500 | 17.59211600 |
| N  | -11.71871700 | 28.73925700 | 16.64726000 |
| C  | -10.90851000 | 29.85962700 | 16.74658700 |
| N  | -10.15080700 | 30.04773100 | 15.69473600 |
| C  | -10.47084200 | 29.00942700 | 14.83055300 |
| C  | -9.98320600  | 28.62051200 | 13.55071600 |
| N  | -8.95541800  | 29.23381100 | 12.94034900 |
| N  | -10.62168600 | 27.59571300 | 12.92863200 |
| C  | -11.62925600 | 26.96416200 | 13.55821300 |
| N  | -12.10790000 | 27.18947200 | 14.78949700 |
| C  | -11.47659300 | 28.21397600 | 15.38317100 |
| Co | -17.66952100 | 32.30503700 | 11.50251300 |
| N  | -19.00661500 | 33.62144100 | 11.45469100 |
| N  | -16.34230600 | 33.68494500 | 11.30090100 |
| N  | -16.52487600 | 30.80841800 | 11.09574700 |
| N  | -19.11142000 | 31.14643100 | 11.72845900 |
| C  | -20.40873400 | 33.12866700 | 11.34791400 |
| C  | -20.69358000 | 32.81240000 | 9.86714800  |
| C  | -21.24619000 | 34.33706800 | 11.90759100 |
| C  | -22.68168100 | 34.42231800 | 11.37412100 |
| C  | -21.30105400 | 34.31310400 | 13.44628000 |
| C  | -20.33127500 | 35.55194400 | 11.50797500 |
| C  | -20.64854600 | 36.30014800 | 10.17424200 |
| C  | -21.41509600 | 37.59495600 | 10.46013100 |
| C  | -18.95384500 | 34.92067500 | 11.53479200 |
| C  | -17.73466200 | 35.67017600 | 11.65167700 |
| C  | -17.90490200 | 37.15379400 | 11.91513800 |
| C  | -16.51000200 | 35.05280700 | 11.52338400 |
| C  | -15.15086300 | 35.77353200 | 11.47471100 |
| C  | -15.08034800 | 36.59722100 | 10.16730900 |
| C  | -14.81032600 | 36.65253500 | 12.69755900 |
| C  | -14.16161800 | 34.57410600 | 11.46773700 |
| C  | -12.96801400 | 34.68697900 | 10.53904000 |
| C  | -15.03237200 | 33.38064400 | 11.20368500 |
| C  | -14.50158800 | 32.12274500 | 10.96183600 |
| C  | -15.20262600 | 30.92475200 | 10.87810500 |

---

|   |              |             |             |
|---|--------------|-------------|-------------|
| C | -14.51342300 | 29.58550500 | 10.66313900 |
| C | -13.54931800 | 29.59981600 | 9.46500300  |
| C | -13.71859400 | 29.24245200 | 11.94408300 |
| C | -15.73105700 | 28.61671800 | 10.52996900 |
| C | -15.98502800 | 28.06002300 | 9.10505800  |
| C | -16.89608200 | 29.46331000 | 11.04526600 |
| C | -18.12472200 | 28.96407000 | 11.41732900 |
| C | -18.32929100 | 27.46534700 | 11.45701100 |
| C | -19.21700600 | 29.84550200 | 11.76659200 |
| C | -20.61444600 | 29.43380300 | 12.25542500 |
| C | -20.50829600 | 29.03450800 | 13.74152700 |
| C | -21.28295300 | 28.34597400 | 11.42196800 |
| C | -21.42350200 | 30.75934700 | 12.06338800 |
| C | -22.62137900 | 30.92330800 | 12.99815800 |
| C | -20.34334900 | 31.82939400 | 12.17825800 |
| C | -17.31337800 | 32.29354900 | 13.41894500 |
| C | -19.35683200 | 32.90171200 | 17.08830900 |
| C | -18.06384900 | 32.07916900 | 17.09576700 |
| C | -18.28754700 | 30.61270000 | 16.72786800 |
| C | -16.97589100 | 29.89186200 | 16.47313600 |
| N | -17.17995300 | 28.56148400 | 15.99372500 |
| C | -16.32226700 | 27.88080600 | 15.20974800 |
| N | -15.06611800 | 28.35470600 | 15.00467900 |
| N | -16.72616400 | 26.77006000 | 14.61250300 |
| C | -5.10613500  | 28.26181400 | 16.21419400 |
| C | -6.20000000  | 29.34537000 | 16.12983100 |
| O | -7.15842400  | 29.19593700 | 15.36987000 |
| N | -6.09273200  | 30.44875200 | 16.92951800 |
| C | -7.09803900  | 31.52497000 | 16.91201700 |
| C | -7.10787400  | 32.29958900 | 15.56725600 |
| O | -6.08867600  | 32.82379300 | 15.13740400 |
| N | -8.32613900  | 32.38082000 | 14.96083900 |
| C | -8.47619000  | 33.01598700 | 13.65200300 |
| C | -17.87840600 | 30.28498100 | 24.18703900 |
| C | -17.52062600 | 30.58551700 | 22.70888400 |
| C | -17.79597200 | 29.45468900 | 21.73828000 |
| C | -17.00904200 | 28.28920100 | 21.77851400 |
| C | -18.78050700 | 29.54723500 | 20.74775700 |
| C | -17.16597100 | 27.27595400 | 20.83674500 |
| C | -18.95789400 | 28.53064000 | 19.80373100 |
| C | -18.13096200 | 27.39796600 | 19.82502500 |
| O | -18.20992900 | 26.41348400 | 18.89385300 |
| C | -13.71988600 | 25.19937500 | 24.47677000 |
| C | -13.13743000 | 26.37056800 | 23.67233000 |

---

|   |              |             |             |
|---|--------------|-------------|-------------|
| O | -14.14153300 | 27.09163300 | 22.94952700 |
| C | -12.02375800 | 25.90442500 | 22.72955000 |
| C | -13.22502400 | 22.26101800 | 11.26002800 |
| C | -12.27993200 | 23.43756400 | 11.45285600 |
| O | -12.72940700 | 24.55231300 | 11.75284900 |
| N | -10.95129500 | 23.18935100 | 11.31627400 |
| C | -9.92400500  | 24.22798700 | 11.39696400 |
| C | -9.80656200  | 24.98556400 | 10.06729400 |
| O | -9.57248000  | 24.37389800 | 9.02790000  |
| N | -9.99302000  | 26.32811200 | 10.14057000 |
| C | -9.78101300  | 27.15300200 | 8.96402600  |
| C | -8.40594100  | 27.79617400 | 8.99451900  |
| O | -7.99616600  | 28.40749300 | 9.98276000  |
| N | -7.71999400  | 27.64783700 | 7.83868500  |
| C | -6.37599300  | 28.13602000 | 7.66102000  |
| C | -19.32864700 | 22.74719300 | 11.65442400 |
| C | -19.57352700 | 24.19533900 | 12.04624300 |
| O | -18.45487600 | 24.62362700 | 12.83292200 |
| C | -20.90953800 | 24.35655100 | 12.77378600 |
| C | -23.26173400 | 24.64428200 | 16.90938400 |
| C | -22.27217900 | 25.80758500 | 16.73294400 |
| C | -20.85688300 | 25.26874300 | 16.43344700 |
| C | -19.86791500 | 26.32047800 | 15.94880900 |
| O | -19.55808000 | 27.27434600 | 16.72614900 |
| O | -19.38314700 | 26.20155000 | 14.77981200 |
| O | -15.52459300 | 25.54486300 | 12.36020500 |
| H | -17.61790000 | 32.14594200 | 18.09481000 |
| H | -17.37332800 | 32.53927700 | 16.37814100 |
| H | -18.90542600 | 30.54995300 | 15.82161200 |
| H | -18.83987100 | 30.09986000 | 17.52124800 |
| H | -16.32772300 | 29.89719100 | 17.63239600 |
| H | -16.30288300 | 30.44912000 | 15.81387800 |
| H | -18.08371300 | 28.09679400 | 16.22760000 |
| H | -17.73668700 | 26.55450600 | 14.63096300 |
| H | -16.12145900 | 26.28924000 | 13.94088000 |
| H | -14.64946700 | 28.82736200 | 15.80819500 |
| H | -14.41024500 | 27.69837700 | 14.59114800 |
| H | -19.86001800 | 32.80079800 | 16.12063100 |
| H | -4.54632400  | 28.27489600 | 15.27413700 |
| H | -8.07647400  | 31.08621300 | 17.12380000 |
| H | -7.76840700  | 32.59771100 | 12.92665800 |
| H | -16.44883800 | 30.81758100 | 22.65412300 |
| H | -18.04045300 | 31.48946700 | 22.37236100 |
| H | -16.23769300 | 28.18347500 | 22.53791300 |



---

|   |              |             |             |
|---|--------------|-------------|-------------|
| H | -19.39843300 | 30.43744700 | 20.68255900 |
| H | -16.53073300 | 26.39627200 | 20.84090800 |
| H | -19.72879100 | 28.60765000 | 19.04175700 |
| H | -18.82236600 | 26.69807800 | 18.17788100 |
| H | -17.89237300 | 29.20549300 | 24.36781400 |
| H | -12.74475300 | 21.28369300 | 11.34161300 |
| H | -10.15811400 | 24.88890900 | 12.23314400 |
| H | -9.93528900  | 26.52376300 | 8.08561800  |
| H | -6.11383000  | 28.72240200 | 8.54271500  |
| H | -19.60696400 | 24.81378400 | 11.13358200 |
| H | -21.05538500 | 25.37920400 | 13.12797600 |
| H | -21.73219100 | 24.09053300 | 12.10243900 |
| H | -20.95323800 | 23.69098100 | 13.64232400 |
| H | -18.81217500 | 25.05555800 | 13.63584000 |
| H | -20.19271500 | 22.32173400 | 11.13217100 |
| H | -22.23146000 | 26.43492600 | 17.62956400 |
| H | -22.60358000 | 26.45758700 | 15.91236500 |
| H | -20.91150500 | 24.47829700 | 15.68192100 |
| H | -20.44719200 | 24.82718400 | 17.35080700 |
| H | -22.82385900 | 23.87431800 | 17.55664500 |
| H | -16.39383200 | 29.67528200 | 19.59502200 |
| H | -15.06703600 | 30.75044800 | 18.94149600 |
| H | -15.36292400 | 27.74026300 | 18.35994100 |
| H | -13.88733000 | 28.66819000 | 20.66768500 |
| H | -13.03412400 | 26.38969200 | 20.13573400 |
| H | -12.10283700 | 29.47588000 | 19.26381000 |
| H | -10.57749500 | 27.62762100 | 19.13171000 |
| H | -12.82376200 | 27.16738100 | 17.37163500 |
| H | -10.92765700 | 30.49960800 | 17.61704900 |
| H | -8.27797600  | 29.69322300 | 13.54058100 |
| H | -12.10152100 | 26.16544700 | 12.99284900 |
| H | -21.72715800 | 32.49552700 | 9.71411100  |
| H | -20.50811200 | 33.68709300 | 9.24248300  |
| H | -20.03316400 | 32.01163700 | 9.52395300  |
| H | -23.19426100 | 35.28312300 | 11.81333300 |
| H | -22.74135700 | 34.51911100 | 10.28931500 |
| H | -23.24993800 | 33.53126300 | 11.65325900 |
| H | -20.30715200 | 34.24871700 | 13.89638800 |
| H | -21.89532500 | 33.47962000 | 13.82678600 |
| H | -20.38451800 | 36.29811200 | 12.30733200 |
| H | -21.22817000 | 35.65645200 | 9.51082100  |
| H | -19.72079600 | 36.51780300 | 9.63345500  |
| H | -20.74390400 | 38.37670100 | 10.83217900 |
| H | -22.15497300 | 37.42121500 | 11.25033100 |

---

|   |              |             |             |
|---|--------------|-------------|-------------|
| H | -16.97821800 | 37.71118900 | 11.85603000 |
| H | -18.32325600 | 37.32640900 | 12.91421500 |
| H | -18.59136400 | 37.61166700 | 11.19985400 |
| H | -14.10744300 | 37.08528300 | 10.06623800 |
| H | -15.24028000 | 35.96387500 | 9.28986900  |
| H | -15.84379000 | 37.37652800 | 10.15281800 |
| H | -15.31738700 | 37.61711200 | 12.70360000 |
| H | -13.73431900 | 36.85859000 | 12.69341500 |
| H | -13.78136300 | 34.44558700 | 12.49211800 |
| H | -13.26344000 | 34.67787400 | 9.48723600  |
| H | -12.26749000 | 33.86198900 | 10.69478700 |
| H | -13.42579100 | 32.05823900 | 10.86731300 |
| H | -13.11226100 | 28.60607600 | 9.32579800  |
| H | -12.72344900 | 30.29474400 | 9.64384300  |
| H | -14.04075000 | 29.89457800 | 8.53480100  |
| H | -13.28451900 | 28.24367100 | 11.84613100 |
| H | -14.36665200 | 29.25457800 | 12.82371500 |
| H | -12.89978500 | 29.95011400 | 12.10824300 |
| H | -15.57851400 | 27.75547800 | 11.18806200 |
| H | -16.16754900 | 28.86220900 | 8.38332300  |
| H | -16.85902100 | 27.40520200 | 9.10863800  |
| H | -18.85732100 | 27.15055400 | 12.35573100 |
| H | -18.90296600 | 27.10543400 | 10.59644700 |
| H | -17.38496900 | 26.92707800 | 11.47034800 |
| H | -21.48084200 | 28.70720300 | 14.12023800 |
| H | -19.81268200 | 28.21153400 | 13.89839200 |
| H | -20.17839500 | 29.87769500 | 14.35488800 |
| H | -22.36193900 | 28.35901100 | 11.61055300 |
| H | -20.93525900 | 27.34248200 | 11.66597800 |
| H | -21.78973400 | 30.75056100 | 11.03063200 |
| H | -23.27406500 | 30.04632100 | 12.95292800 |
| H | -23.22569900 | 31.78920200 | 12.71948000 |
| H | -17.70785000 | 33.22014400 | 13.84448600 |
| H | -17.79154300 | 31.42176500 | 13.86844800 |
| H | -16.23010900 | 32.23460400 | 13.55089200 |
| H | -14.25068700 | 24.51166600 | 23.80748400 |
| H | -12.72027100 | 27.10616400 | 24.37156000 |
| H | -14.35587200 | 26.60652800 | 22.13805900 |
| H | -11.65048500 | 26.73742700 | 22.12674200 |
| H | -11.18531300 | 25.47287500 | 23.28541900 |
| H | -12.40053700 | 25.12343000 | 22.05439300 |
| H | -14.70888000 | 25.05114400 | 12.15588800 |
| H | -16.28625100 | 24.94221700 | 12.30039100 |
| H | -21.98162800 | 38.01287700 | 9.62782300  |

---

|   |              |             |             |
|---|--------------|-------------|-------------|
| H | -21.75501500 | 35.22910400 | 13.82998400 |
| H | -15.12766900 | 27.47392100 | 8.76697100  |
| H | -21.13284700 | 28.51302600 | 10.35020500 |
| H | -23.47538800 | 24.16762700 | 15.94630900 |
| H | -24.21108800 | 24.92058600 | 17.36832100 |
| H | -18.85855700 | 30.68133400 | 24.46570100 |
| H | -17.11636900 | 30.70403700 | 24.84483800 |
| H | -14.41284700 | 25.52109000 | 25.25450200 |
| H | -12.91521800 | 24.63637600 | 24.96328300 |
| H | -4.40179500  | 28.34688900 | 17.04160200 |
| H | -6.83905800  | 32.23246600 | 17.70223400 |
| H | -8.30674500  | 34.09232300 | 13.68539500 |
| H | -8.63475400  | 28.86648200 | 12.04576100 |
| H | -9.02325200  | 31.68741200 | 15.23230700 |
| H | -5.21591800  | 30.62765000 | 17.39504900 |
| H | -5.66299600  | 27.30891000 | 7.56820300  |
| H | -6.28902600  | 28.77003000 | 6.77864500  |
| H | -8.10026800  | 27.02498700 | 7.14201900  |
| H | -10.14570200 | 26.78551800 | 11.04325700 |
| H | -10.67965000 | 22.32086200 | 10.87898600 |
| H | -8.96538000  | 23.74144500 | 11.59118500 |
| H | -19.12377600 | 22.14898800 | 12.54687000 |
| H | -18.47642100 | 22.68895100 | 10.97727900 |
| H | -13.71747600 | 22.34319400 | 10.28633200 |
| H | -5.61578800  | 27.29787400 | 16.27627000 |
| H | -22.31063200 | 31.05326200 | 14.03884600 |
| H | -21.87883700 | 32.61185100 | 16.99167600 |
| H | -18.23178600 | 34.53985800 | 17.83055500 |
| H | -15.05088100 | 36.13552700 | 13.63200800 |
| H | -9.49334400  | 32.83124100 | 13.29870300 |
| H | -13.97954500 | 22.37747400 | 12.03788500 |
| H | -12.41047500 | 35.60920300 | 10.72917700 |
| H | -10.52487100 | 27.95894500 | 8.95352300  |
| H | -20.18459000 | 32.09932700 | 13.22766400 |
| C | -19.30571200 | 36.72576800 | 17.01986100 |
| C | -19.84162500 | 35.31506100 | 16.80774900 |
| O | -20.92626200 | 35.08032800 | 16.27825100 |
| N | -19.01667400 | 34.31460300 | 17.23598800 |
| C | -20.29363000 | 32.44645600 | 18.23110900 |
| O | -19.84775600 | 32.30880400 | 19.36573500 |
| N | -21.58911700 | 32.20930400 | 17.87332100 |
| C | -22.61788700 | 31.96696700 | 18.88107600 |
| H | -18.21843800 | 36.77359300 | 16.90882900 |
| H | -19.77648300 | 37.41047800 | 16.31397700 |

---

|   |              |             |             |
|---|--------------|-------------|-------------|
| H | -19.55827600 | 37.06336800 | 18.03134300 |
| H | -22.11700100 | 31.90774500 | 19.84873800 |
| H | -23.32345900 | 32.80478300 | 18.91035500 |
| H | -23.18863300 | 31.04876900 | 18.74198800 |

**Int1**

|    |              |             |             |
|----|--------------|-------------|-------------|
| C  | -15.04986100 | 30.29419600 | 19.43196200 |
| C  | -14.61541200 | 28.94550600 | 18.89631000 |
| O  | -13.88326400 | 29.18978000 | 17.63984600 |
| C  | -13.64103900 | 28.14967900 | 19.79739500 |
| O  | -14.01856600 | 26.77623300 | 19.80721200 |
| C  | -12.29344500 | 28.31144800 | 19.06943900 |
| O  | -11.43487600 | 27.24731500 | 19.41224900 |
| C  | -12.76038600 | 28.32465000 | 17.60386700 |
| N  | -11.80039200 | 28.80848300 | 16.63445200 |
| C  | -10.97818400 | 29.92036400 | 16.72723700 |
| N  | -10.20060500 | 30.08051900 | 15.68498500 |
| C  | -10.51680700 | 29.02821400 | 14.83607000 |
| C  | -10.01420700 | 28.61235700 | 13.57070200 |
| N  | -8.97372600  | 29.20793200 | 12.96487200 |
| N  | -10.65086300 | 27.58093800 | 12.95674700 |
| C  | -11.67367500 | 26.97031000 | 13.58100800 |
| N  | -12.17068200 | 27.22432500 | 14.79998800 |
| C  | -11.54087000 | 28.25452300 | 15.38670800 |
| Co | -17.67171800 | 32.29839100 | 11.49864800 |
| N  | -19.00739500 | 33.61729000 | 11.44903300 |
| N  | -16.34057600 | 33.67514400 | 11.29982900 |
| N  | -16.52906100 | 30.79868100 | 11.09711900 |
| N  | -19.11521200 | 31.14342400 | 11.72393600 |
| C  | -20.41050100 | 33.12702400 | 11.34449900 |
| C  | -20.69861400 | 32.81049500 | 9.86451200  |
| C  | -21.24528800 | 34.33674800 | 11.90562400 |
| C  | -22.68122400 | 34.42370800 | 11.37367200 |
| C  | -21.29855700 | 34.31267000 | 13.44451600 |
| C  | -20.32892900 | 35.55050400 | 11.50570000 |
| C  | -20.64654500 | 36.30100800 | 10.17324000 |
| C  | -21.41510100 | 37.59494700 | 10.46011100 |
| C  | -18.95254800 | 34.91618700 | 11.53104300 |
| C  | -17.73172000 | 35.66232600 | 11.65187100 |
| C  | -17.90080500 | 37.14523400 | 11.92096700 |
| C  | -16.50784400 | 35.04282300 | 11.52535400 |
| C  | -15.14850200 | 35.76248800 | 11.48630600 |
| C  | -15.07385300 | 36.60068500 | 10.18826800 |
| C  | -14.81169900 | 36.62779300 | 12.72006400 |
| C  | -14.15914700 | 34.56296200 | 11.46978400 |
| C  | -12.96801400 | 34.68698200 | 10.53904600 |
| C  | -15.03072800 | 33.36895700 | 11.20410300 |
| C  | -14.50134000 | 32.10782200 | 10.96967900 |
| C  | -15.20428200 | 30.90976200 | 10.89085600 |

---

|   |              |             |             |
|---|--------------|-------------|-------------|
| C | -14.52048400 | 29.56207600 | 10.70598900 |
| C | -13.51250600 | 29.55077600 | 9.54610300  |
| C | -13.78298300 | 29.21936200 | 12.02212800 |
| C | -15.74060700 | 28.60260900 | 10.53947600 |
| C | -15.98502100 | 28.06001600 | 9.10504900  |
| C | -16.90319300 | 29.45412500 | 11.04920100 |
| C | -18.13231200 | 28.95792400 | 11.42093400 |
| C | -18.33606700 | 27.45932600 | 11.46819100 |
| C | -19.22211200 | 29.84303000 | 11.76601800 |
| C | -20.61766200 | 29.43383600 | 12.25662000 |
| C | -20.50427400 | 29.03699500 | 13.74254900 |
| C | -21.28297200 | 28.34598300 | 11.42196300 |
| C | -21.42691000 | 30.75913200 | 12.06502200 |
| C | -22.62155300 | 30.92431800 | 13.00364100 |
| C | -20.34541200 | 31.82832500 | 12.17556100 |
| C | -17.32196000 | 32.28510300 | 13.41721200 |
| C | -19.36936400 | 32.90667200 | 17.07340600 |
| C | -18.08867700 | 32.06769000 | 17.07611600 |
| C | -18.35021000 | 30.58210600 | 16.81188600 |
| C | -17.12508100 | 29.87839200 | 16.33027800 |
| N | -17.25957400 | 28.56252100 | 15.92062200 |
| C | -16.31098100 | 27.84982000 | 15.27150100 |
| N | -15.05054200 | 28.34147900 | 15.18260500 |
| N | -16.64650700 | 26.70253400 | 14.69573600 |
| C | -5.10612700  | 28.26182300 | 16.21418800 |
| C | -6.20976100  | 29.33711000 | 16.14291700 |
| O | -7.18418000  | 29.17440500 | 15.40604100 |
| N | -6.09081900  | 30.45037000 | 16.92744500 |
| C | -7.09802400  | 31.52496800 | 16.91200700 |
| C | -7.10920600  | 32.29839600 | 15.56707100 |
| O | -6.08917900  | 32.81991700 | 15.13529900 |
| N | -8.32694900  | 32.38014400 | 14.96043500 |
| C | -8.47617700  | 33.01599300 | 13.65201400 |
| C | -17.87835600 | 30.28495300 | 24.18702400 |
| C | -17.51834100 | 30.60477100 | 22.71345900 |
| C | -17.82497400 | 29.50027400 | 21.72221700 |
| C | -17.05026300 | 28.32625300 | 21.71857500 |
| C | -18.83384800 | 29.62280800 | 20.76083100 |
| C | -17.24812600 | 27.32932900 | 20.76705800 |
| C | -19.05933000 | 28.61843400 | 19.81517300 |
| C | -18.25013800 | 27.47309200 | 19.79538800 |
| O | -18.38959200 | 26.49262000 | 18.86762400 |
| C | -13.71976200 | 25.19931500 | 24.47692000 |
| C | -13.16089400 | 26.35316600 | 23.63152700 |

---

|   |              |             |             |
|---|--------------|-------------|-------------|
| O | -14.18285500 | 27.06192900 | 22.91942800 |
| C | -12.07826400 | 25.86151600 | 22.66578600 |
| C | -13.22503200 | 22.26100400 | 11.26000900 |
| C | -12.27883200 | 23.43675600 | 11.45212300 |
| O | -12.72668300 | 24.55180800 | 11.75361800 |
| N | -10.95058500 | 23.18896100 | 11.31291700 |
| C | -9.92397100  | 24.22797600 | 11.39696500 |
| C | -9.80150500  | 24.98600700 | 10.06806200 |
| O | -9.55228200  | 24.37694400 | 9.03082100  |
| N | -10.00193000 | 26.32706700 | 10.13868500 |
| C | -9.78103000  | 27.15301300 | 8.96402200  |
| C | -8.40226900  | 27.78834800 | 8.99890400  |
| O | -7.98773100  | 28.38688700 | 9.99280700  |
| N | -7.72081400  | 27.65016500 | 7.83903600  |
| C | -6.37599400  | 28.13602200 | 7.66102000  |
| C | -19.32864700 | 22.74719000 | 11.65441500 |
| C | -19.56589900 | 24.19848200 | 12.03648100 |
| O | -18.44286500 | 24.62428000 | 12.81730100 |
| C | -20.90066100 | 24.37259800 | 12.76298200 |
| C | -23.26173300 | 24.64425100 | 16.90940300 |
| C | -22.28634800 | 25.81598600 | 16.70883200 |
| C | -20.87096600 | 25.29165400 | 16.38922200 |
| C | -19.89104600 | 26.34914600 | 15.89916500 |
| O | -19.64696700 | 27.34961300 | 16.64230600 |
| O | -19.33867900 | 26.19115600 | 14.76628900 |
| O | -15.48653500 | 25.54337500 | 12.40526900 |
| H | -17.59884400 | 32.18696100 | 18.04947900 |
| H | -17.42638300 | 32.47881700 | 16.30491400 |
| H | -19.15476200 | 30.47557300 | 16.06426100 |
| H | -18.73384800 | 30.10488700 | 17.72071600 |
| H | -15.61992000 | 30.82197100 | 18.66301000 |
| H | -16.28762600 | 30.43398400 | 15.92356800 |
| H | -18.17537400 | 28.09177400 | 16.12070900 |
| H | -17.65354200 | 26.48785800 | 14.64266600 |
| H | -16.00862600 | 26.23493600 | 14.04499300 |
| H | -14.73468400 | 28.88788700 | 15.98570400 |
| H | -14.33143000 | 27.70462700 | 14.84444700 |
| H | -19.88062400 | 32.80122300 | 16.11056500 |
| H | -4.54705100  | 28.28926200 | 15.27383800 |
| H | -8.07496800  | 31.08310800 | 17.12455000 |
| H | -7.76770800  | 32.59786100 | 12.92732300 |
| H | -16.44104300 | 30.81333100 | 22.66319200 |
| H | -18.01643800 | 31.52818400 | 22.39739400 |
| H | -16.25956800 | 28.19971600 | 22.45502700 |

---

|   |              |             |             |
|---|--------------|-------------|-------------|
| H | -19.44044400 | 30.52249900 | 20.72643700 |
| H | -16.62093300 | 26.44463400 | 20.73523700 |
| H | -19.85917900 | 28.71355500 | 19.08516300 |
| H | -18.98820800 | 26.80588700 | 18.15305500 |
| H | -17.88334200 | 29.20343700 | 24.35558600 |
| H | -12.74520500 | 21.28341100 | 11.34119700 |
| H | -10.16268800 | 24.88942500 | 12.23171600 |
| H | -9.93622800  | 26.52616000 | 8.08405700  |
| H | -6.11236300  | 28.72168200 | 8.54277400  |
| H | -19.59679000 | 24.81053300 | 11.11950000 |
| H | -21.03977600 | 25.39758900 | 13.11318700 |
| H | -21.72479400 | 24.11070300 | 12.09183100 |
| H | -20.95043900 | 23.70990500 | 13.63321400 |
| H | -18.79632000 | 25.05127900 | 13.62484600 |
| H | -20.19329700 | 22.32053400 | 11.13409200 |
| H | -22.23814100 | 26.44964400 | 17.60055400 |
| H | -22.63826900 | 26.45771400 | 15.89032000 |
| H | -20.92465200 | 24.50008500 | 15.63928600 |
| H | -20.44398700 | 24.85228000 | 17.30036100 |
| H | -22.81254200 | 23.88947500 | 17.56663300 |
| H | -15.69606400 | 30.15614000 | 20.30056500 |
| H | -14.18427300 | 30.90411500 | 19.71121800 |
| H | -15.48084300 | 28.31280200 | 18.67755900 |
| H | -13.61388100 | 28.53653900 | 20.82254800 |
| H | -13.20327800 | 26.26925600 | 19.94744700 |
| H | -11.85936200 | 29.28952700 | 19.32114200 |
| H | -10.62587900 | 27.30000800 | 18.88700000 |
| H | -13.03332400 | 27.30751000 | 17.29566900 |
| H | -11.01311300 | 30.57944800 | 17.58289500 |
| H | -8.30172300  | 29.67533300 | 13.56488100 |
| H | -12.14391600 | 26.16523400 | 13.02335200 |
| H | -21.73272500 | 32.49420900 | 9.71376500  |
| H | -20.51391700 | 33.68490700 | 9.23918700  |
| H | -20.03935300 | 32.00922200 | 9.52030900  |
| H | -23.19332200 | 35.28357300 | 11.81525700 |
| H | -22.74165700 | 34.52297400 | 10.28911400 |
| H | -23.24936800 | 33.53202400 | 11.65121300 |
| H | -20.30421700 | 34.24672500 | 13.89355500 |
| H | -21.89372200 | 33.48011500 | 13.82560100 |
| H | -20.38014200 | 36.29592900 | 12.30584200 |
| H | -21.22456700 | 35.65752900 | 9.50813200  |
| H | -19.71855400 | 36.52086000 | 9.63373100  |
| H | -20.74468100 | 38.37692100 | 10.83308100 |
| H | -22.15499900 | 37.41962900 | 11.24992600 |



---

|   |              |             |             |
|---|--------------|-------------|-------------|
| H | -16.97327100 | 37.70190700 | 11.86973100 |
| H | -18.32430900 | 37.31368600 | 12.91857200 |
| H | -18.58297200 | 37.60725300 | 11.20407200 |
| H | -14.10014100 | 37.08853700 | 10.09462300 |
| H | -15.23296100 | 35.97751100 | 9.30347000  |
| H | -15.83584400 | 37.38131900 | 10.18032700 |
| H | -15.32317800 | 37.58986300 | 12.73822000 |
| H | -13.73655400 | 36.83841100 | 12.71883700 |
| H | -13.77496500 | 34.42898500 | 12.49194400 |
| H | -13.26593200 | 34.69112900 | 9.48796000  |
| H | -12.26790000 | 33.85920800 | 10.68218800 |
| H | -13.42489600 | 32.04099000 | 10.88183600 |
| H | -13.08766900 | 28.54840600 | 9.43222300  |
| H | -12.68177700 | 30.23339200 | 9.74895100  |
| H | -13.96546900 | 29.84429000 | 8.59604900  |
| H | -13.34871700 | 28.21951800 | 11.94269300 |
| H | -14.46604900 | 29.22923000 | 12.87589100 |
| H | -12.97127300 | 29.92627400 | 12.22145100 |
| H | -15.60083200 | 27.73362500 | 11.19002000 |
| H | -16.14980900 | 28.87050800 | 8.38815500  |
| H | -16.86694100 | 27.41581800 | 9.09543100  |
| H | -18.86669700 | 27.14877400 | 12.36677500 |
| H | -18.90518600 | 27.09291400 | 10.60744500 |
| H | -17.39144400 | 26.92168400 | 11.48926800 |
| H | -21.47512000 | 28.71833500 | 14.13241900 |
| H | -19.81211700 | 28.21034800 | 13.89365400 |
| H | -20.16017800 | 29.87958200 | 14.34938400 |
| H | -22.36249800 | 28.35681800 | 11.60816600 |
| H | -20.93443800 | 27.34276200 | 11.66517800 |
| H | -21.79646800 | 30.74933500 | 11.03344800 |
| H | -23.27446100 | 30.04730700 | 12.96142000 |
| H | -23.22666700 | 31.79023400 | 12.72666500 |
| H | -17.72401000 | 33.20925400 | 13.84112400 |
| H | -17.79221200 | 31.40928400 | 13.86826600 |
| H | -16.23844100 | 32.23508400 | 13.55132900 |
| H | -14.24365800 | 24.48322800 | 23.83192700 |
| H | -12.72356700 | 27.10372500 | 24.30170500 |
| H | -14.42202600 | 26.55907600 | 22.12613700 |
| H | -11.71060400 | 26.67770400 | 22.03728500 |
| H | -11.22985000 | 25.42777100 | 23.20450200 |
| H | -12.48282000 | 25.07685600 | 22.01152300 |
| H | -14.68036100 | 25.04977600 | 12.16490400 |
| H | -16.25753500 | 24.95580200 | 12.32170000 |
| H | -21.98162600 | 38.01288100 | 9.62783800  |

---

|   |              |             |             |
|---|--------------|-------------|-------------|
| H | -21.75080400 | 35.22925000 | 13.82885300 |
| H | -15.13007800 | 27.46728000 | 8.77222200  |
| H | -21.13125700 | 28.51440300 | 10.35062500 |
| H | -23.47628900 | 24.15035500 | 15.95522400 |
| H | -24.21110300 | 24.92060600 | 17.36830700 |
| H | -18.86116700 | 30.67216400 | 24.46868400 |
| H | -17.11640500 | 30.70406900 | 24.84484700 |
| H | -14.41294900 | 25.52111800 | 25.25437700 |
| H | -12.89981400 | 24.66296400 | 24.96808200 |
| H | -4.40181000  | 28.34688100 | 17.04161000 |
| H | -6.83990200  | 32.23252500 | 17.70248100 |
| H | -8.30675800  | 34.09232300 | 13.68538900 |
| H | -8.64581900  | 28.82979700 | 12.07781200 |
| H | -9.03054100  | 31.69478200 | 15.23586600 |
| H | -5.20343700  | 30.64126700 | 17.36768700 |
| H | -5.66406500  | 27.30799900 | 7.56760800  |
| H | -6.28902100  | 28.77002700 | 6.77864600  |
| H | -8.10481400  | 27.03450300 | 7.13803500  |
| H | -10.16379700 | 26.78118100 | 11.04068800 |
| H | -10.67834000 | 22.32031900 | 10.87628700 |
| H | -8.96570900  | 23.74231600 | 11.59491000 |
| H | -19.12326900 | 22.15355700 | 12.54967700 |
| H | -18.47642500 | 22.68895000 | 10.97728300 |
| H | -13.71776400 | 22.34332400 | 10.28644700 |
| H | -5.60701300  | 27.29299800 | 16.26796800 |
| H | -22.30677900 | 31.05473500 | 14.04310900 |
| H | -21.88358100 | 32.56223100 | 16.97578600 |
| H | -18.22947800 | 34.53515800 | 17.80740400 |
| H | -15.05038800 | 36.09795500 | 13.64778900 |
| H | -9.49308500  | 32.83122700 | 13.29798800 |
| H | -13.97955300 | 22.37748000 | 12.03789800 |
| H | -12.40957000 | 35.60631000 | 10.73979400 |
| H | -10.52047200 | 27.96283000 | 8.95283400  |
| H | -20.18358100 | 32.09883800 | 13.22432100 |
| C | -19.30578800 | 36.72582300 | 17.01986400 |
| C | -19.84146400 | 35.31836800 | 16.79777300 |
| O | -20.93179700 | 35.08860300 | 16.27846900 |
| N | -19.00894300 | 34.31479400 | 17.20371400 |
| C | -20.30145100 | 32.47770600 | 18.22774400 |
| O | -19.85737700 | 32.39133000 | 19.36816800 |
| N | -21.58915700 | 32.19909800 | 17.87244900 |
| C | -22.61794300 | 31.96699200 | 18.88104900 |
| H | -18.21828000 | 36.77602500 | 16.91314700 |
| H | -19.77641800 | 37.41046300 | 16.31397800 |

---

|   |              |             |             |
|---|--------------|-------------|-------------|
| H | -19.56426600 | 37.05895100 | 18.03128100 |
| H | -22.11703500 | 31.91055100 | 19.84877100 |
| H | -23.32202500 | 32.80636600 | 18.90762500 |
| H | -23.18858500 | 31.04875200 | 18.74201500 |

## TS2

|    |              |             |             |
|----|--------------|-------------|-------------|
| C  | -15.15580100 | 30.31169800 | 19.34596600 |
| C  | -14.73141600 | 28.95950600 | 18.80818700 |
| O  | -13.98962900 | 29.19865600 | 17.55522300 |
| C  | -13.76817500 | 28.16280800 | 19.71942300 |
| O  | -14.12664900 | 26.78590600 | 19.69894700 |
| C  | -12.40938400 | 28.35454100 | 19.02100900 |
| O  | -11.53661400 | 27.30884800 | 19.38157900 |
| C  | -12.84591900 | 28.35421000 | 17.54642300 |
| N  | -11.87440100 | 28.84454300 | 16.59452100 |
| C  | -11.03843900 | 29.94596500 | 16.70344100 |
| N  | -10.23371100 | 30.08991300 | 15.67988000 |
| C  | -10.54183900 | 29.03666800 | 14.82842200 |
| C  | -10.01599800 | 28.60797600 | 13.57617200 |
| N  | -8.96361300  | 29.19356600 | 12.98325800 |
| N  | -10.64482800 | 27.57315200 | 12.95977800 |
| C  | -11.68612200 | 26.97588200 | 13.56424600 |
| N  | -12.21406300 | 27.24905300 | 14.76646600 |
| C  | -11.58796300 | 28.27863300 | 15.35785000 |
| Co | -17.59682000 | 32.28556400 | 11.61409700 |
| N  | -18.91480200 | 33.64447200 | 11.54821900 |
| N  | -16.22677400 | 33.64706000 | 11.56057100 |
| N  | -16.46593800 | 30.79079600 | 11.15143300 |
| N  | -19.08028400 | 31.15895600 | 11.71956500 |
| C  | -20.30762600 | 33.17557800 | 11.31443200 |
| C  | -20.48269400 | 32.88758700 | 9.81115200  |
| C  | -21.17177700 | 34.38543500 | 11.82595000 |
| C  | -22.56447400 | 34.47065000 | 11.18739000 |
| C  | -21.34058200 | 34.34064500 | 13.35590700 |
| C  | -20.21807000 | 35.60182200 | 11.50918600 |
| C  | -20.48066300 | 36.39992600 | 10.18860600 |
| C  | -21.41493500 | 37.59488200 | 10.46014200 |
| C  | -18.84496600 | 34.94298900 | 11.62300900 |
| C  | -17.61265600 | 35.65498100 | 11.85313100 |
| C  | -17.78686400 | 37.12599400 | 12.18674000 |
| C  | -16.38889100 | 35.01530200 | 11.78505600 |
| C  | -15.01193800 | 35.70918900 | 11.87219400 |
| C  | -14.87255000 | 36.80034300 | 10.78822200 |
| C  | -14.73505700 | 36.29190800 | 13.27663000 |
| C  | -14.01788100 | 34.52052300 | 11.64154800 |
| C  | -12.96810000 | 34.68695000 | 10.53903200 |
| C  | -14.92216800 | 33.33348100 | 11.42374500 |
| C  | -14.41622100 | 32.07236200 | 11.13188300 |
| C  | -15.14017000 | 30.89353900 | 10.96662900 |

---

|   |              |             |             |
|---|--------------|-------------|-------------|
| C | -14.47747700 | 29.55595600 | 10.66321900 |
| C | -13.56836300 | 29.63215800 | 9.42357200  |
| C | -13.62966300 | 29.12765800 | 11.87971900 |
| C | -15.71254100 | 28.60541100 | 10.52784000 |
| C | -15.98496400 | 28.05999500 | 9.10497100  |
| C | -16.86698600 | 29.46104300 | 11.04930000 |
| C | -18.11185900 | 28.97350100 | 11.39257400 |
| C | -18.33606900 | 27.47606600 | 11.41308400 |
| C | -19.20681400 | 29.86169900 | 11.72575200 |
| C | -20.61546700 | 29.47188100 | 12.19973800 |
| C | -20.51835300 | 29.13617000 | 13.70313700 |
| C | -21.28295100 | 28.34624400 | 11.42207200 |
| C | -21.40606600 | 30.79843700 | 11.94579400 |
| C | -22.65121900 | 30.97582900 | 12.81346000 |
| C | -20.32023900 | 31.85626500 | 12.11916600 |
| C | -17.29595000 | 31.61035500 | 13.85358700 |
| C | -19.33137200 | 32.92490700 | 17.15743700 |
| C | -18.03171400 | 32.12321900 | 17.23104900 |
| C | -18.23284800 | 30.63350900 | 16.92405300 |
| C | -17.16229400 | 30.07807500 | 16.04433200 |
| N | -17.31106100 | 28.75739200 | 15.67588000 |
| C | -16.36742300 | 27.99128000 | 15.05671600 |
| N | -15.08076600 | 28.40224200 | 15.03863600 |
| N | -16.75516900 | 26.88451700 | 14.45631700 |
| C | -5.10612700  | 28.26182700 | 16.21419000 |
| C | -6.21548400  | 29.33207100 | 16.15233300 |
| O | -7.20055100  | 29.16122800 | 15.43130300 |
| N | -6.08935500  | 30.45158600 | 16.92703000 |
| C | -7.09804500  | 31.52496500 | 16.91202000 |
| C | -7.11008600  | 32.29680500 | 15.56676700 |
| O | -6.08942900  | 32.81577400 | 15.13340200 |
| N | -8.32774100  | 32.37958700 | 14.96030700 |
| C | -8.47618500  | 33.01598900 | 13.65199700 |
| C | -17.87838500 | 30.28492400 | 24.18702200 |
| C | -17.51990300 | 30.61953800 | 22.71817200 |
| C | -17.85459700 | 29.54086000 | 21.70848600 |
| C | -17.09638600 | 28.35648600 | 21.66735000 |
| C | -18.86707100 | 29.70424900 | 20.75782500 |
| C | -17.30786000 | 27.39432300 | 20.68365100 |
| C | -19.10496400 | 28.73606400 | 19.77717200 |
| C | -18.30514300 | 27.58535300 | 19.71468300 |
| O | -18.44172600 | 26.64875700 | 18.74278300 |
| C | -13.71987900 | 25.19940600 | 24.47673800 |
| C | -13.20550900 | 26.34746100 | 23.59514700 |

---

|   |              |             |             |
|---|--------------|-------------|-------------|
| O | -14.25701000 | 27.02002700 | 22.88824300 |
| C | -12.13326000 | 25.86220700 | 22.61507300 |
| C | -13.22508200 | 22.26117600 | 11.26002600 |
| C | -12.27883800 | 23.43538700 | 11.45786400 |
| O | -12.72780900 | 24.54733100 | 11.77028500 |
| N | -10.95126900 | 23.18947100 | 11.31252800 |
| C | -9.92400700  | 24.22798100 | 11.39697100 |
| C | -9.80349600  | 24.98544300 | 10.06754800 |
| O | -9.55671300  | 24.37501700 | 9.03057400  |
| N | -10.00436100 | 26.32623900 | 10.13779500 |
| C | -9.78102500  | 27.15299800 | 8.96404100  |
| C | -8.39958400  | 27.78270500 | 9.00180800  |
| O | -7.97981100  | 28.36873500 | 10.00100600 |
| N | -7.72194400  | 27.65337100 | 7.83886100  |
| C | -6.37598300  | 28.13601400 | 7.66100600  |
| C | -19.32866700 | 22.74723500 | 11.65444500 |
| C | -19.57128000 | 24.19366200 | 12.04854100 |
| O | -18.44992100 | 24.61311800 | 12.83730400 |
| C | -20.90799500 | 24.35223000 | 12.77593600 |
| C | -23.26171700 | 24.64430000 | 16.90945300 |
| C | -22.32985000 | 25.84769000 | 16.64338600 |
| C | -20.87528800 | 25.38915700 | 16.38819100 |
| C | -19.93212600 | 26.45691900 | 15.83417400 |
| O | -19.69456500 | 27.50138700 | 16.51814600 |
| O | -19.39281200 | 26.25570600 | 14.70136600 |
| O | -15.50592600 | 25.50246800 | 12.39472900 |
| H | -17.61979100 | 32.24451900 | 18.23880500 |
| H | -17.33035400 | 32.56858800 | 16.51807400 |
| H | -19.21152200 | 30.44871200 | 16.46014900 |
| H | -18.26222300 | 30.06274300 | 17.86381900 |
| H | -15.69043800 | 30.86793200 | 18.57199700 |
| H | -16.15511300 | 30.46800500 | 16.11002100 |
| H | -18.23990700 | 28.30937800 | 15.86334000 |
| H | -17.76781000 | 26.66894000 | 14.44834300 |
| H | -16.11034500 | 26.32511900 | 13.88447800 |
| H | -14.76639400 | 28.92954000 | 15.85455400 |
| H | -14.37929200 | 27.73482200 | 14.72101400 |
| H | -19.80071600 | 32.79349700 | 16.17647700 |
| H | -4.54777700  | 28.29876100 | 15.27364200 |
| H | -8.07395700  | 31.08096000 | 17.12518200 |
| H | -7.76712400  | 32.59780500 | 12.92805900 |
| H | -16.43832300 | 30.80385200 | 22.66507400 |
| H | -17.99843700 | 31.55934100 | 22.42064200 |
| H | -16.30509900 | 28.19781700 | 22.39698100 |

---

|   |              |             |             |
|---|--------------|-------------|-------------|
| H | -19.46406900 | 30.61042500 | 20.75551000 |
| H | -16.68886100 | 26.50578300 | 20.61842600 |
| H | -19.90274000 | 28.86869900 | 19.05064400 |
| H | -19.03123500 | 26.99285200 | 18.03318300 |
| H | -17.87614200 | 29.20201800 | 24.34704100 |
| H | -12.74633300 | 21.28290500 | 11.33894800 |
| H | -10.16187400 | 24.88893200 | 12.23231000 |
| H | -9.93743600  | 26.52759500 | 8.08329000  |
| H | -6.11066600  | 28.72073200 | 8.54285900  |
| H | -19.60353700 | 24.81592700 | 11.13873700 |
| H | -21.06337000 | 25.37697500 | 13.11866700 |
| H | -21.72810900 | 24.07316500 | 12.10684700 |
| H | -20.94655900 | 23.69403000 | 13.65059500 |
| H | -18.80942600 | 25.05960000 | 13.63032000 |
| H | -20.19262100 | 22.32344400 | 11.13068700 |
| H | -22.33692500 | 26.54206400 | 17.49041100 |
| H | -22.69692700 | 26.41277500 | 15.77670700 |
| H | -20.86767300 | 24.54473900 | 15.69564800 |
| H | -20.44514100 | 25.04145900 | 17.33646200 |
| H | -22.77997600 | 23.93945900 | 17.59799500 |
| H | -15.82685800 | 30.17924100 | 20.19642600 |
| H | -14.28641600 | 30.90139500 | 19.65469900 |
| H | -15.59786600 | 28.32988200 | 18.58416600 |
| H | -13.76824600 | 28.53600200 | 20.75016000 |
| H | -13.31340600 | 26.28824300 | 19.87829200 |
| H | -12.00212000 | 29.34209900 | 19.28067700 |
| H | -10.71232600 | 27.38558700 | 18.88367800 |
| H | -13.09770700 | 27.33159500 | 17.23999500 |
| H | -11.08375300 | 30.60893900 | 17.55566700 |
| H | -8.29920300  | 29.66588600 | 13.58781000 |
| H | -12.14666100 | 26.16673900 | 13.00483500 |
| H | -21.50212600 | 32.57201600 | 9.57869200  |
| H | -20.25504800 | 33.77415500 | 9.21790400  |
| H | -19.79686400 | 32.09444400 | 9.50266700  |
| H | -23.14192100 | 35.28183500 | 11.63910400 |
| H | -22.54201700 | 34.63844400 | 10.10968400 |
| H | -23.12020800 | 33.54527300 | 11.36094700 |
| H | -20.38430500 | 34.25775300 | 13.87711600 |
| H | -21.97236100 | 33.50981800 | 13.67773000 |
| H | -20.31072800 | 36.32758500 | 12.32392400 |
| H | -20.90669300 | 35.74089100 | 9.42965900  |
| H | -19.53022400 | 36.75116300 | 9.77257200  |
| H | -20.84891400 | 38.41736900 | 10.91283400 |
| H | -22.17314900 | 37.30931600 | 11.19784400 |

---

|   |              |             |             |
|---|--------------|-------------|-------------|
| H | -16.85798700 | 37.63276800 | 12.41985000 |
| H | -18.43513700 | 37.24174400 | 13.06310000 |
| H | -18.26003300 | 37.67875100 | 11.36836500 |
| H | -13.86598600 | 37.22654800 | 10.80014300 |
| H | -15.06183900 | 36.39693000 | 9.79007200  |
| H | -15.57123900 | 37.62095700 | 10.94477500 |
| H | -15.36862600 | 37.14500600 | 13.52274500 |
| H | -13.69373700 | 36.62810100 | 13.33142900 |
| H | -13.47222700 | 34.33648000 | 12.57718700 |
| H | -13.42364200 | 34.78433300 | 9.55056400  |
| H | -12.30053400 | 33.82177900 | 10.51189800 |
| H | -13.34114600 | 31.99369400 | 11.03189100 |
| H | -13.13727600 | 28.64889400 | 9.21006500  |
| H | -12.73746400 | 30.32148100 | 9.60093600  |
| H | -14.10262100 | 29.97511000 | 8.53436800  |
| H | -13.22367400 | 28.12759900 | 11.70618600 |
| H | -14.23488900 | 29.10433400 | 12.78910000 |
| H | -12.78841700 | 29.80799100 | 12.04546100 |
| H | -15.56779700 | 27.73867100 | 11.18119900 |
| H | -16.17272100 | 28.86822600 | 8.39167300  |
| H | -16.86167300 | 27.40919300 | 9.11192400  |
| H | -18.88312000 | 27.16274300 | 12.30127100 |
| H | -18.90255300 | 27.12802500 | 10.54262500 |
| H | -17.39912300 | 26.92419700 | 11.43791600 |
| H | -21.49731700 | 28.85849700 | 14.10402900 |
| H | -19.85310500 | 28.29234300 | 13.87556600 |
| H | -20.14446800 | 29.98730900 | 14.28112900 |
| H | -22.36299500 | 28.36896500 | 11.60307000 |
| H | -20.93787900 | 27.35605100 | 11.71812900 |
| H | -21.71139500 | 30.78171900 | 10.89257600 |
| H | -23.30373600 | 30.10013400 | 12.74546000 |
| H | -23.23804100 | 31.84039700 | 12.49610000 |
| H | -18.17335900 | 32.05333800 | 14.30767400 |
| H | -17.32287600 | 30.56221900 | 13.60294400 |
| H | -16.33369300 | 32.05353500 | 14.08283700 |
| H | -14.23030200 | 24.45138600 | 23.85750600 |
| H | -12.77315700 | 27.12261500 | 24.23975300 |
| H | -14.51611900 | 26.48215600 | 22.12546200 |
| H | -11.79294300 | 26.67685200 | 21.96936800 |
| H | -11.26686400 | 25.44968400 | 23.14168300 |
| H | -12.53723700 | 25.06262700 | 21.97839400 |
| H | -14.68447900 | 25.02308000 | 12.17776300 |
| H | -16.26540800 | 24.90104600 | 12.30738200 |
| H | -21.98171300 | 38.01285900 | 9.62778700  |



---

|   |              |             |             |
|---|--------------|-------------|-------------|
| H | -21.80980600 | 35.25867600 | 13.71708200 |
| H | -15.13484900 | 27.47265200 | 8.74988900  |
| H | -21.12774100 | 28.45735800 | 10.34383800 |
| H | -23.47012300 | 24.09960600 | 15.98258200 |
| H | -24.21108700 | 24.92058100 | 17.36825900 |
| H | -18.86298400 | 30.66444200 | 24.47242900 |
| H | -17.11636400 | 30.70406600 | 24.84483200 |
| H | -14.41287000 | 25.52109600 | 25.25450700 |
| H | -12.87795800 | 24.70042900 | 24.96969100 |
| H | -4.40180000  | 28.34688000 | 17.04161000 |
| H | -6.84072800  | 32.23312100 | 17.70226200 |
| H | -8.30675100  | 34.09231500 | 13.68539800 |
| H | -8.62782500  | 28.81190800 | 12.10069300 |
| H | -9.03518300  | 31.69991600 | 15.23857500 |
| H | -5.19494200  | 30.65130100 | 17.34896900 |
| H | -5.66573900  | 27.30658800 | 7.56672900  |
| H | -6.28902600  | 28.77003900 | 6.77865000  |
| H | -8.11127100  | 27.04805200 | 7.13183600  |
| H | -10.15833600 | 26.78048100 | 11.04086400 |
| H | -10.68097600 | 22.32485800 | 10.86659300 |
| H | -8.96580600  | 23.74173500 | 11.59378400 |
| H | -19.12495000 | 22.14697900 | 12.54579300 |
| H | -18.47639300 | 22.68896000 | 10.97731300 |
| H | -13.71678500 | 22.34703500 | 10.28625000 |
| H | -5.60164100  | 27.29009200 | 16.26251800 |
| H | -22.39302400 | 31.11674300 | 13.86714300 |
| H | -21.83367000 | 32.49784300 | 16.97629000 |
| H | -18.27078800 | 34.58491200 | 17.92857600 |
| H | -14.88607200 | 35.52911200 | 14.04776700 |
| H | -9.49276600  | 32.83148900 | 13.29702300 |
| H | -13.97950100 | 22.37739400 | 12.03791300 |
| H | -12.34314400 | 35.56560800 | 10.71911100 |
| H | -10.51830500 | 27.96479100 | 8.95355400  |
| H | -20.21511800 | 32.10962600 | 13.17957100 |
| C | -19.30567100 | 36.72546800 | 17.01972000 |
| C | -19.82440400 | 35.31676500 | 16.79732000 |
| O | -20.87610300 | 35.06030600 | 16.21625300 |
| N | -19.00810800 | 34.33750200 | 17.28402600 |
| C | -20.29465600 | 32.49673900 | 18.28542200 |
| O | -19.88879100 | 32.45580000 | 19.44287800 |
| N | -21.56207500 | 32.17826100 | 17.89651200 |
| C | -22.61792800 | 31.96688600 | 18.88107100 |
| H | -18.21835400 | 36.78103700 | 16.91297800 |
| H | -19.77651600 | 37.41053900 | 16.31405100 |

---

|   |              |             |             |
|---|--------------|-------------|-------------|
| H | -19.56371200 | 37.05701800 | 18.03200400 |
| H | -22.14310300 | 31.92550100 | 19.86234800 |
| H | -23.31929200 | 32.80906600 | 18.87513700 |
| H | -23.18867400 | 31.04882800 | 18.74201800 |

## TS2'

|    |              |             |             |
|----|--------------|-------------|-------------|
| C  | -14.86665400 | 30.36991100 | 19.60886500 |
| C  | -14.55536400 | 29.01350300 | 19.00753800 |
| O  | -13.87342800 | 29.24095500 | 17.71958100 |
| C  | -13.59485100 | 28.13784500 | 19.84251400 |
| O  | -14.03715300 | 26.78462400 | 19.80988700 |
| C  | -12.26592400 | 28.26992400 | 19.07807000 |
| O  | -11.44154800 | 27.16224300 | 19.36025500 |
| C  | -12.77471700 | 28.34503700 | 17.62837000 |
| N  | -11.82520000 | 28.82870100 | 16.64883200 |
| C  | -11.00079700 | 29.93965500 | 16.73724800 |
| N  | -10.22051400 | 30.09222700 | 15.69596900 |
| C  | -10.53525500 | 29.03429800 | 14.85305500 |
| C  | -10.03051600 | 28.60996200 | 13.59120600 |
| N  | -8.98938300  | 29.20263900 | 12.98315600 |
| N  | -10.66528100 | 27.57425000 | 12.98265300 |
| C  | -11.68839000 | 26.96684800 | 13.60936400 |
| N  | -12.18752700 | 27.22903300 | 14.82602600 |
| C  | -11.56103300 | 28.26462600 | 15.40608200 |
| Co | -17.66747100 | 32.29760700 | 11.50688800 |
| N  | -19.00117300 | 33.61891500 | 11.45211800 |
| N  | -16.33214100 | 33.67173200 | 11.31476100 |
| N  | -16.52715800 | 30.79566700 | 11.10615800 |
| N  | -19.11338400 | 31.14546800 | 11.72320600 |
| C  | -20.40464200 | 33.13088100 | 11.34330900 |
| C  | -20.68973100 | 32.81592200 | 9.86241100  |
| C  | -21.23901300 | 34.34128300 | 11.90359200 |
| C  | -22.67378800 | 34.42921500 | 11.36870200 |
| C  | -21.29539200 | 34.31616100 | 13.44253900 |
| C  | -20.32042200 | 35.55445200 | 11.50637600 |
| C  | -20.63545400 | 36.30683100 | 10.17405700 |
| C  | -21.41510700 | 37.59492500 | 10.46009800 |
| C  | -18.94459300 | 34.91756300 | 11.53564300 |
| C  | -17.72248200 | 35.66042600 | 11.66519000 |
| C  | -17.89235000 | 37.14213200 | 11.94163700 |
| C  | -16.49874400 | 35.03893500 | 11.54302700 |
| C  | -15.13819900 | 35.75687200 | 11.51826500 |
| C  | -15.05722800 | 36.61997000 | 10.23708600 |
| C  | -14.80767400 | 36.59812900 | 12.77034900 |
| C  | -14.14824900 | 34.55700200 | 11.48404300 |
| C  | -12.96799900 | 34.68698500 | 10.53903500 |
| C  | -15.02256300 | 33.36325000 | 11.22150100 |
| C  | -14.49545200 | 32.10003600 | 10.99037100 |
| C  | -15.20109200 | 30.90325700 | 10.90715700 |

---

|   |              |             |             |
|---|--------------|-------------|-------------|
| C | -14.52199800 | 29.55234500 | 10.72314800 |
| C | -13.50297300 | 29.53880600 | 9.57339000  |
| C | -13.80066000 | 29.19973600 | 12.04605200 |
| C | -15.74467600 | 28.59887000 | 10.54183100 |
| C | -15.98500800 | 28.06000700 | 9.10502600  |
| C | -16.90559700 | 29.45239500 | 11.04879000 |
| C | -18.13762400 | 28.95793900 | 11.41081000 |
| C | -18.34837000 | 27.45973600 | 11.44205700 |
| C | -19.22372800 | 29.84530600 | 11.75951400 |
| C | -20.61759300 | 29.43830400 | 12.25245300 |
| C | -20.49342800 | 29.04599000 | 13.73891300 |
| C | -21.28301100 | 28.34606200 | 11.42197700 |
| C | -21.42612300 | 30.76332700 | 12.06005100 |
| C | -22.62066600 | 30.92846300 | 12.99855600 |
| C | -20.34345300 | 31.83126600 | 12.17331900 |
| C | -17.32426300 | 32.28891500 | 13.42865700 |
| C | -19.38092500 | 32.90730500 | 17.05054000 |
| C | -18.09777100 | 32.06997400 | 17.08238700 |
| C | -18.32565000 | 30.59743300 | 16.89107200 |
| C | -17.14682700 | 29.74127700 | 16.63156600 |
| N | -17.30722800 | 28.56789900 | 15.86534200 |
| C | -16.33096800 | 27.88984700 | 15.24100500 |
| N | -15.05181700 | 28.34350500 | 15.26024000 |
| N | -16.64636500 | 26.79784500 | 14.55117700 |
| C | -5.10612600  | 28.26182100 | 16.21418600 |
| C | -6.21515300  | 29.33238100 | 16.15064700 |
| O | -7.19837200  | 29.16230700 | 15.42714600 |
| N | -6.08999200  | 30.45102700 | 16.92692400 |
| C | -7.09803000  | 31.52497000 | 16.91201200 |
| C | -7.11004900  | 32.29668100 | 15.56650300 |
| O | -6.08929200  | 32.81522200 | 15.13262500 |
| N | -8.32781900  | 32.37989500 | 14.96039900 |
| C | -8.47619900  | 33.01599900 | 13.65201600 |
| C | -17.87838500 | 30.28500000 | 24.18702100 |
| C | -17.49401200 | 30.62795900 | 22.72361600 |
| C | -17.81883400 | 29.56544800 | 21.69362100 |
| C | -17.09632900 | 28.35805300 | 21.67371500 |
| C | -18.79166900 | 29.76269300 | 20.70870400 |
| C | -17.32198300 | 27.39342800 | 20.69560000 |
| C | -19.04251800 | 28.79406200 | 19.73137300 |
| C | -18.29878000 | 27.60452700 | 19.70913200 |
| O | -18.47396300 | 26.64638300 | 18.76587900 |
| C | -13.71983000 | 25.19935900 | 24.47683600 |
| C | -13.17480900 | 26.35317600 | 23.62288900 |

---

|   |              |             |             |
|---|--------------|-------------|-------------|
| O | -14.20768900 | 27.05362800 | 22.91683200 |
| C | -12.09733700 | 25.86369400 | 22.65041500 |
| C | -13.22502800 | 22.26105000 | 11.26003600 |
| C | -12.27766000 | 23.43623900 | 11.45107100 |
| O | -12.72332100 | 24.55265700 | 11.75115000 |
| N | -10.94953200 | 23.18790800 | 11.31245500 |
| C | -9.92399400  | 24.22797400 | 11.39695600 |
| C | -9.80050500  | 24.98608700 | 10.06834500 |
| O | -9.54556600  | 24.37821400 | 9.03191600  |
| N | -10.00548400 | 26.32669400 | 10.13801200 |
| C | -9.78101900  | 27.15300400 | 8.96403000  |
| C | -8.40100800  | 27.78567700 | 9.00102300  |
| O | -7.98503800  | 28.37904200 | 9.99732100  |
| N | -7.72126500  | 27.65154900 | 7.83952400  |
| C | -6.37599700  | 28.13602100 | 7.66102000  |
| C | -19.32861500 | 22.74724600 | 11.65445000 |
| C | -19.55997900 | 24.19841500 | 12.04110400 |
| O | -18.43441600 | 24.61725400 | 12.82190500 |
| C | -20.89444700 | 24.37503500 | 12.76767700 |
| C | -23.26166400 | 24.64422900 | 16.90947900 |
| C | -22.30981600 | 25.82828100 | 16.67442700 |
| C | -20.88178900 | 25.32901300 | 16.37543000 |
| C | -19.93320100 | 26.39825700 | 15.85175900 |
| O | -19.76165600 | 27.45485000 | 16.53771400 |
| O | -19.33523100 | 26.19794200 | 14.75091300 |
| O | -15.48006800 | 25.55100300 | 12.31379800 |
| H | -17.61136300 | 32.26399100 | 18.05078000 |
| H | -17.42950200 | 32.45744600 | 16.29747600 |
| H | -19.30447100 | 30.19347800 | 16.65525800 |
| H | -17.74937600 | 29.81670800 | 17.80212700 |
| H | -15.43684800 | 30.97430500 | 18.89828900 |
| H | -16.18140100 | 30.23344700 | 16.59798100 |
| H | -18.24958200 | 28.12786500 | 15.93583200 |
| H | -17.64215900 | 26.55378400 | 14.50180600 |
| H | -15.99432300 | 26.36000500 | 13.89517800 |
| H | -14.76028300 | 28.87428200 | 16.07902400 |
| H | -14.33052400 | 27.70113300 | 14.93848600 |
| H | -19.89057500 | 32.77619100 | 16.09052200 |
| H | -4.54760300  | 28.29750200 | 15.27369900 |
| H | -8.07414700  | 31.08184300 | 17.12555900 |
| H | -7.76694700  | 32.59782000 | 12.92820800 |
| H | -16.41000100 | 30.80517800 | 22.69525600 |
| H | -17.95829300 | 31.57586700 | 22.42923900 |
| H | -16.32654200 | 28.17808300 | 22.42159500 |

---

|   |              |             |             |
|---|--------------|-------------|-------------|
| H | -19.35341400 | 30.69147300 | 20.68090600 |
| H | -16.73836300 | 26.47951000 | 20.65792800 |
| H | -19.81339600 | 28.95430500 | 18.98284200 |
| H | -19.07898100 | 26.97625600 | 18.06326500 |
| H | -17.88030100 | 29.20184400 | 24.34364000 |
| H | -12.74549400 | 21.28330400 | 11.34102800 |
| H | -10.16445800 | 24.88957500 | 12.23120900 |
| H | -9.93610100  | 26.52666700 | 8.08369000  |
| H | -6.11137300  | 28.72129700 | 8.54275500  |
| H | -19.58877600 | 24.81304900 | 11.12585300 |
| H | -21.03344400 | 25.40091600 | 13.11481200 |
| H | -21.71863100 | 24.11148800 | 12.09719300 |
| H | -20.94447900 | 23.71471600 | 13.63973800 |
| H | -18.78467100 | 25.03704900 | 13.63474800 |
| H | -20.19464700 | 22.32545000 | 11.13242800 |
| H | -22.27851400 | 26.49105700 | 17.54545300 |
| H | -22.67334900 | 26.43675400 | 15.83585800 |
| H | -20.91019800 | 24.51005500 | 15.65390400 |
| H | -20.44360700 | 24.93396000 | 17.30159100 |
| H | -22.79654400 | 23.91433700 | 17.58351400 |
| H | -15.47464400 | 30.24084100 | 20.50617900 |
| H | -13.94818900 | 30.90904200 | 19.86339300 |
| H | -15.47267700 | 28.44883000 | 18.81740200 |
| H | -13.52075600 | 28.48131400 | 20.88075600 |
| H | -13.24425900 | 26.23456400 | 19.91069400 |
| H | -11.78395500 | 29.22154200 | 19.34438200 |
| H | -10.64530200 | 27.20186600 | 18.81460200 |
| H | -13.08580100 | 27.34629800 | 17.29782700 |
| H | -11.03901400 | 30.60442300 | 17.58845700 |
| H | -8.31764300  | 29.67273500 | 13.58126400 |
| H | -12.15720900 | 26.15773900 | 13.05632200 |
| H | -21.72408900 | 32.50167600 | 9.70901900  |
| H | -20.50175300 | 33.69024800 | 9.23797300  |
| H | -20.03119900 | 32.01354200 | 9.51947500  |
| H | -23.18853200 | 35.28571800 | 11.81366900 |
| H | -22.73149000 | 34.53425000 | 10.28451300 |
| H | -23.24109500 | 33.53501800 | 11.63990000 |
| H | -20.30192000 | 34.24769800 | 13.89327100 |
| H | -21.89304600 | 33.48446300 | 13.82162500 |
| H | -20.37286400 | 36.29942200 | 12.30682100 |
| H | -21.20424900 | 35.66095400 | 9.50328000  |
| H | -19.70549500 | 36.53511300 | 9.64149400  |
| H | -20.75093800 | 38.37986700 | 10.83824500 |
| H | -22.15651900 | 37.41259000 | 11.24685900 |

---

|   |              |             |             |
|---|--------------|-------------|-------------|
| H | -16.96340400 | 37.69781200 | 11.90901100 |
| H | -18.33053600 | 37.30409400 | 12.93394200 |
| H | -18.56330100 | 37.61045100 | 11.21786800 |
| H | -14.08104400 | 37.10484700 | 10.15475400 |
| H | -15.21768700 | 36.01518000 | 9.33996600  |
| H | -15.81485500 | 37.40458100 | 10.24208600 |
| H | -15.33099900 | 37.55308900 | 12.81179700 |
| H | -13.73498800 | 36.82104500 | 12.77166700 |
| H | -13.75029500 | 34.41761900 | 12.49997500 |
| H | -13.27894100 | 34.70303300 | 9.49186900  |
| H | -12.26989000 | 33.85462000 | 10.66452000 |
| H | -13.41870800 | 32.03072400 | 10.90669000 |
| H | -13.08322300 | 28.53413300 | 9.46054900  |
| H | -12.67012300 | 30.21604300 | 9.78568700  |
| H | -13.94590100 | 29.83735100 | 8.62011800  |
| H | -13.37061700 | 28.19815300 | 11.96596100 |
| H | -14.49203000 | 29.20824200 | 12.89344900 |
| H | -12.98805400 | 29.90194500 | 12.25815700 |
| H | -15.61260500 | 27.72620400 | 11.18830100 |
| H | -16.14191800 | 28.87226300 | 8.38820800  |
| H | -16.86976800 | 27.42012100 | 9.09033300  |
| H | -18.87808900 | 27.14169200 | 12.33851400 |
| H | -18.92199400 | 27.10692000 | 10.57862000 |
| H | -17.40666200 | 26.91700000 | 11.45344300 |
| H | -21.46448300 | 28.74875100 | 14.14453500 |
| H | -19.81975300 | 28.20265000 | 13.87597600 |
| H | -20.11445800 | 29.87697400 | 14.34304600 |
| H | -22.36311000 | 28.35997700 | 11.60513400 |
| H | -20.93747600 | 27.34372800 | 11.67190700 |
| H | -21.79507000 | 30.75439100 | 11.02814900 |
| H | -23.27371300 | 30.05153600 | 12.95639900 |
| H | -23.22562800 | 31.79497300 | 12.72295800 |
| H | -17.68080400 | 33.23853200 | 13.83676900 |
| H | -17.83883500 | 31.44518300 | 13.89351700 |
| H | -16.24448000 | 32.18812400 | 13.56383400 |
| H | -14.24024600 | 24.47481300 | 23.83849100 |
| H | -12.73648400 | 27.10864900 | 24.28684300 |
| H | -14.44525100 | 26.54881900 | 22.12422400 |
| H | -11.73276400 | 26.67943100 | 22.01964700 |
| H | -11.24552300 | 25.43089000 | 23.18440600 |
| H | -12.50439000 | 25.07902000 | 21.99792800 |
| H | -14.66547400 | 25.05329800 | 12.11278100 |
| H | -16.24049300 | 24.94506400 | 12.28711700 |
| H | -21.98162100 | 38.01289100 | 9.62784600  |

---

|   |              |             |             |
|---|--------------|-------------|-------------|
| H | -21.74702800 | 35.23315400 | 13.82665300 |
| H | -15.13123200 | 27.46340200 | 8.77593200  |
| H | -21.12857300 | 28.50861100 | 10.35019900 |
| H | -23.47469000 | 24.12263800 | 15.96995100 |
| H | -24.21112900 | 24.92062600 | 17.36824800 |
| H | -18.86361600 | 30.66983200 | 24.46207900 |
| H | -17.11638100 | 30.70401600 | 24.84484600 |
| H | -14.41290800 | 25.52110100 | 25.25443900 |
| H | -12.89349500 | 24.67332500 | 24.96824000 |
| H | -4.40180700  | 28.34688200 | 17.04161100 |
| H | -6.83988300  | 32.23317000 | 17.70194600 |
| H | -8.30674300  | 34.09231300 | 13.68538800 |
| H | -8.65947100  | 28.81930700 | 12.09924500 |
| H | -9.03561100  | 31.70062800 | 15.23976400 |
| H | -5.19635600  | 30.64938500 | 17.35108500 |
| H | -5.66479600  | 27.30739300 | 7.56717300  |
| H | -6.28902300  | 28.77002900 | 6.77864600  |
| H | -8.10685900  | 27.03870600 | 7.13692800  |
| H | -10.17260300 | 26.77891900 | 11.03932100 |
| H | -10.67642700 | 22.31833300 | 10.87827400 |
| H | -8.96536400  | 23.74343700 | 11.59582500 |
| H | -19.12531300 | 22.14983100 | 12.54767400 |
| H | -18.47643300 | 22.68892000 | 10.97726700 |
| H | -13.71801900 | 22.34358500 | 10.28661900 |
| H | -5.60204700  | 27.29030000 | 16.26319800 |
| H | -22.30453400 | 31.05761600 | 14.03784500 |
| H | -21.87637500 | 32.43954900 | 16.94706300 |
| H | -18.22797200 | 34.52794800 | 17.76273700 |
| H | -15.03829200 | 36.04429300 | 13.68605700 |
| H | -9.49273300  | 32.83115000 | 13.29703300 |
| H | -13.97954400 | 22.37745500 | 12.03789000 |
| H | -12.40338700 | 35.60183500 | 10.74256800 |
| H | -10.51917600 | 27.96390600 | 8.95198000  |
| H | -20.18369500 | 32.10031400 | 13.22270600 |
| C | -19.30570000 | 36.72563700 | 17.01985800 |
| C | -19.84425400 | 35.32188500 | 16.78043400 |
| O | -20.94467000 | 35.10061900 | 16.28125700 |
| N | -18.99896300 | 34.31215100 | 17.14600600 |
| C | -20.31117700 | 32.52592100 | 18.22245700 |
| O | -19.88236800 | 32.55121300 | 19.37143900 |
| N | -21.58029000 | 32.16637500 | 17.87401800 |
| C | -22.61787900 | 31.96693200 | 18.88110500 |
| H | -18.21797700 | 36.77805900 | 16.91859500 |
| H | -19.77649500 | 37.41054500 | 16.31395100 |



---

|   |              |             |             |
|---|--------------|-------------|-------------|
| H | -19.57292300 | 37.05069500 | 18.03145100 |
| H | -22.12372700 | 31.92087300 | 19.85253700 |
| H | -23.31547700 | 32.81221000 | 18.88905900 |
| H | -23.18866900 | 31.04880200 | 18.74198300 |

**Int2'**

|    |              |             |             |
|----|--------------|-------------|-------------|
| C  | -14.70499900 | 30.30612600 | 19.71666700 |
| C  | -14.42724000 | 28.94712300 | 19.10409500 |
| O  | -13.81000300 | 29.16585800 | 17.78487900 |
| C  | -13.43713000 | 28.06722200 | 19.89442900 |
| O  | -13.89322000 | 26.71798200 | 19.87563900 |
| C  | -12.14184000 | 28.19464700 | 19.07677800 |
| O  | -11.31452400 | 27.08006800 | 19.31897900 |
| C  | -12.70453700 | 28.28485500 | 17.64665800 |
| N  | -11.79042000 | 28.79769500 | 16.64779300 |
| C  | -10.97307100 | 29.91392000 | 16.73598200 |
| N  | -10.20855000 | 30.08271500 | 15.68568500 |
| C  | -10.52636800 | 29.03028800 | 14.83738500 |
| C  | -10.02866100 | 28.61529700 | 13.56997900 |
| N  | -8.99178400  | 29.21321300 | 12.95966900 |
| N  | -10.66444700 | 27.58125500 | 12.95985800 |
| C  | -11.68100000 | 26.96621800 | 13.59015000 |
| N  | -12.16959100 | 27.21632500 | 14.81358300 |
| C  | -11.54026400 | 28.24870500 | 15.39587600 |
| Co | -17.67350000 | 32.29458500 | 11.51241100 |
| N  | -19.01063400 | 33.61270600 | 11.46349500 |
| N  | -16.34314300 | 33.67036800 | 11.30213400 |
| N  | -16.53250600 | 30.79378000 | 11.10676800 |
| N  | -19.11464100 | 31.13908100 | 11.74282800 |
| C  | -20.41343900 | 33.12035600 | 11.36773400 |
| C  | -20.70824500 | 32.80049900 | 9.88960500  |
| C  | -21.24589500 | 34.33181500 | 11.92830200 |
| C  | -22.68626200 | 34.41428800 | 11.40812500 |
| C  | -21.28634900 | 34.31537900 | 13.46787100 |
| C  | -20.33493900 | 35.54554900 | 11.51418200 |
| C  | -20.66237000 | 36.28941200 | 10.17894100 |
| C  | -21.41509800 | 37.59494800 | 10.46010800 |
| C  | -18.95700300 | 34.91230400 | 11.53542600 |
| C  | -17.73573100 | 35.65931900 | 11.64419200 |
| C  | -17.90370200 | 37.14464000 | 11.90017400 |
| C  | -16.51186800 | 35.03926000 | 11.51811200 |
| C  | -15.15397200 | 35.76039600 | 11.46843800 |
| C  | -15.08393200 | 36.58197200 | 10.15938200 |
| C  | -14.81456700 | 36.64178300 | 12.68998800 |
| C  | -14.16329900 | 34.56224800 | 11.46423000 |
| C  | -12.96801800 | 34.68698000 | 10.53905200 |
| C  | -15.03289900 | 33.36452100 | 11.20507900 |
| C  | -14.50349700 | 32.10174900 | 10.97773600 |
| C  | -15.20743200 | 30.90304300 | 10.90292500 |

---

|   |              |             |             |
|---|--------------|-------------|-------------|
| C | -14.52702800 | 29.55148500 | 10.72838500 |
| C | -13.49736100 | 29.52939400 | 9.58885200  |
| C | -13.81972000 | 29.20737200 | 12.06126800 |
| C | -15.74822500 | 28.59735600 | 10.54279600 |
| C | -15.98502200 | 28.06000900 | 9.10504700  |
| C | -16.90968500 | 29.44968800 | 11.04945700 |
| C | -18.14060300 | 28.95334300 | 11.41075700 |
| C | -18.35344100 | 27.45504600 | 11.42587700 |
| C | -19.22458400 | 29.83883400 | 11.77118900 |
| C | -20.61488400 | 29.42610400 | 12.26737100 |
| C | -20.48206800 | 29.01337300 | 13.74764900 |
| C | -21.28297300 | 28.34598200 | 11.42195900 |
| C | -21.42554600 | 30.75339700 | 12.09659100 |
| C | -22.60638400 | 30.91323600 | 13.05327200 |
| C | -20.34289100 | 31.82268200 | 12.20127200 |
| C | -17.31326700 | 32.29968600 | 13.43139200 |
| C | -19.38679900 | 32.90953000 | 17.03202000 |
| C | -18.11753000 | 32.05323500 | 17.09785700 |
| C | -18.30559700 | 30.62649100 | 16.71966200 |
| C | -17.10765800 | 29.73535700 | 16.78548300 |
| N | -17.28625200 | 28.55130900 | 15.95803800 |
| C | -16.33040700 | 27.94420700 | 15.24844400 |
| N | -15.04602400 | 28.38547800 | 15.29001600 |
| N | -16.66220700 | 26.93411500 | 14.45370000 |
| C | -5.10612900  | 28.26182600 | 16.21418800 |
| C | -6.21515300  | 29.33237200 | 16.14952000 |
| O | -7.19746300  | 29.16263000 | 15.42485800 |
| N | -6.09037800  | 30.45070700 | 16.92664400 |
| C | -7.09802800  | 31.52496600 | 16.91200800 |
| C | -7.10994100  | 32.29776800 | 15.56707300 |
| O | -6.08966500  | 32.81856100 | 15.13480400 |
| N | -8.32739300  | 32.37950300 | 14.96007300 |
| C | -8.47617900  | 33.01599100 | 13.65201800 |
| C | -17.87835300 | 30.28495700 | 24.18701500 |
| C | -17.49450500 | 30.64717000 | 22.72666700 |
| C | -17.78714900 | 29.58718600 | 21.68460500 |
| C | -17.06907800 | 28.37761800 | 21.68501000 |
| C | -18.72692600 | 29.79104400 | 20.66808300 |
| C | -17.27448600 | 27.41309800 | 20.70179000 |
| C | -18.95265300 | 28.82639100 | 19.68233900 |
| C | -18.22129800 | 27.62915000 | 19.68736100 |
| O | -18.37629200 | 26.66808900 | 18.74366500 |
| C | -13.71975700 | 25.19931400 | 24.47692700 |
| C | -13.14811700 | 26.35582800 | 23.64519000 |

---

|   |              |             |             |
|---|--------------|-------------|-------------|
| O | -14.16118400 | 27.06204200 | 22.91731300 |
| C | -12.04600800 | 25.86542100 | 22.70041700 |
| C | -13.22503500 | 22.26100600 | 11.26001100 |
| C | -12.27772600 | 23.43620100 | 11.45010400 |
| O | -12.72356600 | 24.55260000 | 11.74928400 |
| N | -10.94939400 | 23.18786800 | 11.31177900 |
| C | -9.92397100  | 24.22797500 | 11.39696100 |
| C | -9.79867700  | 24.98612200 | 10.06839500 |
| O | -9.54284300  | 24.37811400 | 9.03221400  |
| N | -10.00325600 | 26.32666900 | 10.13809200 |
| C | -9.78103100  | 27.15301300 | 8.96402000  |
| C | -8.40247500  | 27.78871900 | 8.99951600  |
| O | -7.98861500  | 28.38779700 | 9.99345900  |
| N | -7.72078300  | 27.65033400 | 7.83976100  |
| C | -6.37599200  | 28.13602400 | 7.66102100  |
| C | -19.32865400 | 22.74719300 | 11.65441500 |
| C | -19.54410100 | 24.19859700 | 12.05348200 |
| O | -18.41431700 | 24.60233200 | 12.83677800 |
| C | -20.87695000 | 24.38438600 | 12.78022700 |
| C | -23.26172200 | 24.64425700 | 16.90940100 |
| C | -22.29975500 | 25.82095900 | 16.68457600 |
| C | -20.87862300 | 25.30899200 | 16.37658100 |
| C | -19.91842900 | 26.37685000 | 15.87167100 |
| O | -19.76208900 | 27.43021600 | 16.56542200 |
| O | -19.30073800 | 26.17611500 | 14.78192300 |
| O | -15.48986700 | 25.55534400 | 12.30348200 |
| H | -17.73203200 | 32.12571900 | 18.13110600 |
| H | -17.35760700 | 32.50833600 | 16.44399000 |
| H | -19.29112300 | 30.16915400 | 16.71903600 |
| H | -16.93305200 | 29.44381700 | 17.83481100 |
| H | -15.29920900 | 30.91453600 | 19.02954200 |
| H | -16.22270800 | 30.29085200 | 16.45330700 |
| H | -18.22077000 | 28.10435000 | 16.02910300 |
| H | -17.65028100 | 26.65390400 | 14.44397600 |
| H | -15.99871500 | 26.46343800 | 13.83417800 |
| H | -14.74214400 | 28.85370600 | 16.14134800 |
| H | -14.33366800 | 27.76887600 | 14.90674400 |
| H | -19.88684600 | 32.77628400 | 16.06737700 |
| H | -4.54737700  | 28.29686200 | 15.27380500 |
| H | -8.07429800  | 31.08203600 | 17.12521600 |
| H | -7.76723400  | 32.59819700 | 12.92761500 |
| H | -16.41485200 | 30.85126100 | 22.70626500 |
| H | -17.97878400 | 31.58646000 | 22.43707500 |
| H | -16.32054800 | 28.19219200 | 22.45315200 |

---

|   |              |             |             |
|---|--------------|-------------|-------------|
| H | -19.28465500 | 30.72195000 | 20.62669000 |
| H | -16.70162400 | 26.49139000 | 20.68609200 |
| H | -19.69438500 | 28.99369300 | 18.90606700 |
| H | -19.01009700 | 26.97397700 | 18.05523200 |
| H | -17.87350400 | 29.20055600 | 24.33348300 |
| H | -12.74546800 | 21.28326100 | 11.34117000 |
| H | -10.16517000 | 24.88951900 | 12.23093100 |
| H | -9.93556200  | 26.52658500 | 8.08361500  |
| H | -6.11183400  | 28.72165100 | 8.54266300  |
| H | -19.56626800 | 24.81955500 | 11.14243300 |
| H | -21.00441400 | 25.40887900 | 13.13580500 |
| H | -21.70334800 | 24.13585300 | 12.10670400 |
| H | -20.93557900 | 23.71724100 | 13.64640600 |
| H | -18.75667700 | 25.01567900 | 13.65696900 |
| H | -20.19881600 | 22.34002900 | 11.12785000 |
| H | -22.25856100 | 26.47471700 | 17.56183700 |
| H | -22.65856200 | 26.44192500 | 15.85311800 |
| H | -20.91646800 | 24.50064700 | 15.64379500 |
| H | -20.44451500 | 24.89474700 | 17.29640400 |
| H | -22.80300400 | 23.90512600 | 17.57789500 |
| H | -15.27554600 | 30.18221600 | 20.63910300 |
| H | -13.77254500 | 30.83828000 | 19.93201900 |
| H | -15.35121200 | 28.37844000 | 18.96685100 |
| H | -13.32126700 | 28.40798900 | 20.92957900 |
| H | -13.10378200 | 26.15910100 | 19.95111700 |
| H | -11.64320500 | 29.14090500 | 19.33124400 |
| H | -10.53429300 | 27.12430900 | 18.75102200 |
| H | -13.01333500 | 27.28802900 | 17.30858800 |
| H | -11.00514000 | 30.57086600 | 17.59344700 |
| H | -8.32021000  | 29.68480800 | 13.55647700 |
| H | -12.15236100 | 26.16029600 | 13.03467100 |
| H | -21.74273400 | 32.48306400 | 9.74403700  |
| H | -20.52706800 | 33.67381800 | 9.26169800  |
| H | -20.04994500 | 31.99907800 | 9.54405000  |
| H | -23.19346000 | 35.27965300 | 11.84484000 |
| H | -22.75594700 | 34.50204400 | 10.32313100 |
| H | -23.25281200 | 33.52610700 | 11.70011600 |
| H | -20.28764000 | 34.25280100 | 13.90798600 |
| H | -21.87638500 | 33.48302100 | 13.85744500 |
| H | -20.38218200 | 36.29521800 | 12.31069700 |
| H | -21.25536400 | 35.64612900 | 9.52695900  |
| H | -19.73879100 | 36.49436000 | 9.62606500  |
| H | -20.73430300 | 38.37241800 | 10.82348700 |
| H | -22.15234800 | 37.43315700 | 11.25544700 |

---

|   |              |             |             |
|---|--------------|-------------|-------------|
| H | -16.97733000 | 37.70173000 | 11.83465300 |
| H | -18.31857900 | 37.32325900 | 12.89967000 |
| H | -18.59252400 | 37.59845900 | 11.18459200 |
| H | -14.11230100 | 37.07239900 | 10.05775400 |
| H | -15.24202400 | 35.94648500 | 9.28316600  |
| H | -15.84913600 | 37.35935700 | 10.14247500 |
| H | -15.32194700 | 37.60619300 | 12.69414600 |
| H | -13.73858900 | 36.84818300 | 12.68651200 |
| H | -13.78393300 | 34.43612300 | 12.48927900 |
| H | -13.26046800 | 34.68495300 | 9.48647000  |
| H | -12.26519700 | 33.86262200 | 10.68937700 |
| H | -13.42694000 | 32.03447400 | 10.89019200 |
| H | -13.07841500 | 28.52324900 | 9.48636500  |
| H | -12.66514600 | 30.20635400 | 9.80458200  |
| H | -13.93107000 | 29.82251000 | 8.62968500  |
| H | -13.39453200 | 28.20276100 | 11.99516800 |
| H | -14.52030600 | 29.22941400 | 12.90064900 |
| H | -13.00595400 | 29.90766200 | 12.27502900 |
| H | -15.61766900 | 27.72398100 | 11.18846100 |
| H | -16.13910400 | 28.87310500 | 8.38848700  |
| H | -16.86994900 | 27.42063900 | 9.08688100  |
| H | -18.88511300 | 27.12742200 | 12.31753600 |
| H | -18.92643400 | 27.11431500 | 10.55710300 |
| H | -17.41270700 | 26.91065500 | 11.43270900 |
| H | -21.45155900 | 28.71455600 | 14.15584400 |
| H | -19.81020600 | 28.16628600 | 13.87075100 |
| H | -20.09394000 | 29.83351400 | 14.36019500 |
| H | -22.36276300 | 28.35853800 | 11.60752000 |
| H | -20.93848000 | 27.33968500 | 11.65677200 |
| H | -21.81019100 | 30.75177400 | 11.07054000 |
| H | -23.26160600 | 30.03779900 | 13.01369200 |
| H | -23.21338800 | 31.78311000 | 12.79277300 |
| H | -17.63985900 | 33.26372100 | 13.83103500 |
| H | -17.84437000 | 31.47679600 | 13.91540400 |
| H | -16.23460800 | 32.17282700 | 13.55569600 |
| H | -14.24648400 | 24.49365300 | 23.82297600 |
| H | -12.72386900 | 27.10577800 | 24.32439900 |
| H | -14.37564500 | 26.56269200 | 22.11415600 |
| H | -11.66365400 | 26.68055500 | 22.07923000 |
| H | -11.20844300 | 25.43397200 | 23.25738800 |
| H | -12.43527000 | 25.07976000 | 22.03883500 |
| H | -14.67525900 | 25.05416400 | 12.11357000 |
| H | -16.24881700 | 24.94636800 | 12.30748700 |
| H | -21.98162600 | 38.01287500 | 9.62784500  |

---

|   |              |             |             |
|---|--------------|-------------|-------------|
| H | -21.73835900 | 35.23220800 | 13.85190200 |
| H | -15.13061000 | 27.46317400 | 8.77793200  |
| H | -21.13052000 | 28.52400200 | 10.35235300 |
| H | -23.47649900 | 24.13114800 | 15.96546500 |
| H | -24.21109700 | 24.92060700 | 17.36830400 |
| H | -18.86497500 | 30.66235000 | 24.46687400 |
| H | -17.11640700 | 30.70406500 | 24.84485400 |
| H | -14.41295200 | 25.52111900 | 25.25436500 |
| H | -12.90742000 | 24.65164200 | 24.96819500 |
| H | -4.40180700  | 28.34688000 | 17.04161000 |
| H | -6.83985800  | 32.23263900 | 17.70240400 |
| H | -8.30675700  | 34.09232200 | 13.68538700 |
| H | -8.66371500  | 28.83416300 | 12.07291700 |
| H | -9.03331200  | 31.69732900 | 15.23710900 |
| H | -5.19682600  | 30.64878000 | 17.35112000 |
| H | -5.66427100  | 27.30784300 | 7.56736400  |
| H | -6.28902100  | 28.77002600 | 6.77864500  |
| H | -8.10446800  | 27.03359500 | 7.13952200  |
| H | -10.17304800 | 26.77972500 | 11.03887000 |
| H | -10.67604100 | 22.31823800 | 10.87788800 |
| H | -8.96556700  | 23.74340100 | 11.59686300 |
| H | -19.13163700 | 22.13934800 | 12.54197100 |
| H | -18.47642000 | 22.68895300 | 10.97728900 |
| H | -13.71836600 | 22.34316300 | 10.28674600 |
| H | -5.60207300  | 27.29030900 | 16.26339400 |
| H | -22.27490300 | 31.03361800 | 14.08890600 |
| H | -21.89733500 | 32.43946700 | 16.93573200 |
| H | -18.21521000 | 34.52155300 | 17.73489900 |
| H | -15.05591600 | 36.12616000 | 13.62499000 |
| H | -9.49282000  | 32.83118500 | 13.29730400 |
| H | -13.97955200 | 22.37747800 | 12.03790000 |
| H | -12.41475800 | 35.60967100 | 10.73875300 |
| H | -10.52062900 | 27.96263100 | 8.95242700  |
| H | -20.17572200 | 32.09406500 | 13.24883200 |
| C | -19.30577800 | 36.72581900 | 17.01986000 |
| C | -19.84728600 | 35.32341800 | 16.78452000 |
| O | -20.95753300 | 35.10304500 | 16.30767600 |
| N | -18.99414400 | 34.31118100 | 17.12624600 |
| C | -20.32596700 | 32.53970000 | 18.20275200 |
| O | -19.89575000 | 32.57141600 | 19.35177100 |
| N | -21.59303900 | 32.17324600 | 17.86205400 |
| C | -22.61794000 | 31.96699200 | 18.88105200 |
| H | -18.21819800 | 36.77702300 | 16.91727400 |
| H | -19.77642600 | 37.41047900 | 16.31397800 |

---

|   |              |             |             |
|---|--------------|-------------|-------------|
| H | -19.57198700 | 37.05320500 | 18.03100300 |
| H | -22.11200000 | 31.91580200 | 19.84582000 |
| H | -23.31660300 | 32.81113600 | 18.90223400 |
| H | -23.18860000 | 31.04874600 | 18.74201700 |



---

**TS3'**

|    |              |             |             |
|----|--------------|-------------|-------------|
| C  | -14.80147800 | 30.31738800 | 19.57566300 |
| C  | -14.50132700 | 28.94799500 | 18.99623500 |
| O  | -13.84105800 | 29.14427200 | 17.69320700 |
| C  | -13.53091600 | 28.09216300 | 19.83714700 |
| O  | -13.95735800 | 26.73397700 | 19.81211300 |
| C  | -12.20538400 | 28.23753300 | 19.07129400 |
| O  | -11.36170500 | 27.14875100 | 19.36841000 |
| C  | -12.71317100 | 28.28229200 | 17.61968300 |
| N  | -11.77572000 | 28.78521500 | 16.64009900 |
| C  | -10.97428300 | 29.91345200 | 16.72313900 |
| N  | -10.20398400 | 30.08078100 | 15.67704800 |
| C  | -10.50192800 | 29.01607800 | 14.83669100 |
| C  | -9.99513900  | 28.59894400 | 13.57346600 |
| N  | -8.96894100  | 29.20908900 | 12.95784400 |
| N  | -10.61428100 | 27.55079800 | 12.97098300 |
| C  | -11.62329100 | 26.92592100 | 13.60301100 |
| N  | -12.12047800 | 27.17937400 | 14.82186400 |
| C  | -11.50904700 | 28.22683800 | 15.39594200 |
| Co | -17.56403800 | 32.27540300 | 11.63635700 |
| N  | -18.86183700 | 33.64967100 | 11.50487000 |
| N  | -16.16800400 | 33.61097600 | 11.61034300 |
| N  | -16.43921200 | 30.75860100 | 11.23041600 |
| N  | -19.06461500 | 31.16439200 | 11.68567400 |
| C  | -20.25067000 | 33.19339800 | 11.22213200 |
| C  | -20.37078200 | 32.91251200 | 9.71273400  |
| C  | -21.12629500 | 34.40431700 | 11.70629300 |
| C  | -22.48535700 | 34.49236100 | 10.99673200 |
| C  | -21.37373100 | 34.34580900 | 13.22429800 |
| C  | -20.14989200 | 35.61994300 | 11.45558500 |
| C  | -20.39093700 | 36.47521500 | 10.17100700 |
| C  | -21.41501800 | 37.59494600 | 10.46014900 |
| C  | -18.78010400 | 34.94767300 | 11.58967200 |
| C  | -17.54044400 | 35.63680600 | 11.86820300 |
| C  | -17.68418300 | 37.11238200 | 12.19913900 |
| C  | -16.32226300 | 34.97921200 | 11.83908200 |
| C  | -14.93793600 | 35.63292600 | 12.05820500 |
| C  | -14.69771400 | 36.87743300 | 11.18088400 |
| C  | -14.75434900 | 35.97731000 | 13.55587900 |
| C  | -13.94568700 | 34.46748700 | 11.70858200 |
| C  | -12.96800500 | 34.68698500 | 10.53905700 |
| C  | -14.86233600 | 33.28343200 | 11.50037500 |
| C  | -14.36962000 | 32.01271400 | 11.22558900 |
| C  | -15.10977400 | 30.84355400 | 11.05136100 |

---

|   |              |             |             |
|---|--------------|-------------|-------------|
| C | -14.46928400 | 29.49630400 | 10.73464100 |
| C | -13.52672900 | 29.57244500 | 9.52124000  |
| C | -13.66713300 | 29.02470300 | 11.96728300 |
| C | -15.71922700 | 28.57349500 | 10.54878600 |
| C | -15.98499100 | 28.06001500 | 9.10507600  |
| C | -16.86055300 | 29.43647900 | 11.08674100 |
| C | -18.11645700 | 28.96332800 | 11.40454700 |
| C | -18.36098200 | 27.46921000 | 11.41517300 |
| C | -19.20372100 | 29.86703600 | 11.71155200 |
| C | -20.62787000 | 29.50325200 | 12.15732300 |
| C | -20.57830100 | 29.23104800 | 13.67672000 |
| C | -21.28301000 | 28.34609600 | 11.42190500 |
| C | -21.39817600 | 30.82403900 | 11.82283400 |
| C | -22.68673500 | 31.02637700 | 12.61848300 |
| C | -20.31223100 | 31.87695200 | 12.02753100 |
| C | -17.49776100 | 31.83636900 | 13.87701300 |
| C | -19.33427700 | 32.92534000 | 17.11479900 |
| C | -18.04011400 | 32.09441800 | 17.18056500 |
| C | -18.05963800 | 30.87920100 | 16.31157600 |
| C | -17.01562900 | 29.83576500 | 16.57012900 |
| N | -17.25554600 | 28.64155400 | 15.78034100 |
| C | -16.32283900 | 27.92093300 | 15.14093300 |
| N | -15.01526500 | 28.27562100 | 15.19441300 |
| N | -16.70835200 | 26.88462800 | 14.41067100 |
| C | -5.10612200  | 28.26182700 | 16.21418300 |
| C | -6.21576900  | 29.33171400 | 16.15145200 |
| O | -7.20020800  | 29.16052000 | 15.43006500 |
| N | -6.08959100  | 30.45139100 | 16.92655400 |
| C | -7.09803200  | 31.52495600 | 16.91200100 |
| C | -7.10993200  | 32.29865700 | 15.56762400 |
| O | -6.08992200  | 32.82096900 | 15.13659400 |
| N | -8.32705100  | 32.37900400 | 14.95976600 |
| C | -8.47617700  | 33.01599900 | 13.65201000 |
| C | -17.87839100 | 30.28492800 | 24.18702300 |
| C | -17.50317800 | 30.66540700 | 22.72931700 |
| C | -17.78049400 | 29.62000200 | 21.66718300 |
| C | -17.07669700 | 28.40185800 | 21.66552100 |
| C | -18.67480000 | 29.85950800 | 20.61802800 |
| C | -17.25208600 | 27.46665200 | 20.64899900 |
| C | -18.86245000 | 28.92965900 | 19.59025500 |
| C | -18.14588700 | 27.72293400 | 19.59593600 |
| O | -18.25763000 | 26.79316500 | 18.61601200 |
| C | -13.71975400 | 25.19927800 | 24.47693100 |
| C | -13.17271800 | 26.35384800 | 23.62536300 |

---

|   |              |             |             |
|---|--------------|-------------|-------------|
| O | -14.20302700 | 27.04612900 | 22.90691000 |
| C | -12.08182600 | 25.86722000 | 22.66638400 |
| C | -13.22506700 | 22.26102900 | 11.26001700 |
| C | -12.27750500 | 23.43485400 | 11.45475300 |
| O | -12.72501800 | 24.54986400 | 11.75876500 |
| N | -10.94957800 | 23.18729600 | 11.31669800 |
| C | -9.92393400  | 24.22791800 | 11.39693500 |
| C | -9.80843000  | 24.98468300 | 10.06657300 |
| O | -9.57126300  | 24.37290000 | 9.02812400  |
| N | -10.00001500 | 26.32658700 | 10.13882700 |
| C | -9.78102900  | 27.15298200 | 8.96399700  |
| C | -8.40197900  | 27.78750400 | 8.99930000  |
| O | -7.98563400  | 28.38229400 | 9.99491300  |
| N | -7.72127500  | 27.65151700 | 7.83896200  |
| C | -6.37599200  | 28.13602700 | 7.66101900  |
| C | -19.32864200 | 22.74718400 | 11.65441600 |
| C | -19.57994300 | 24.18889600 | 12.06145900 |
| O | -18.47323900 | 24.60031300 | 12.87205600 |
| C | -20.92773800 | 24.33066900 | 12.77241900 |
| C | -23.26170400 | 24.64421400 | 16.90939800 |
| C | -22.34152200 | 25.85041800 | 16.62385700 |
| C | -20.89115600 | 25.40280400 | 16.33321400 |
| C | -19.96790700 | 26.49697100 | 15.79627400 |
| O | -19.74951000 | 27.52591600 | 16.50944300 |
| O | -19.43286400 | 26.33670800 | 14.65511300 |
| O | -15.49673500 | 25.49804100 | 12.30685500 |
| H | -17.86759800 | 31.80983800 | 18.23186900 |
| H | -17.19504400 | 32.73666700 | 16.89783000 |
| H | -19.02486300 | 30.50316400 | 15.98159700 |
| H | -17.04725600 | 29.58214700 | 17.64403900 |
| H | -15.36141200 | 30.91910900 | 18.85510800 |
| H | -16.01758000 | 30.23880200 | 16.37258300 |
| H | -18.19901300 | 28.22357400 | 15.89788200 |
| H | -17.71523300 | 26.69141500 | 14.36416300 |
| H | -16.06603300 | 26.36501700 | 13.80533400 |
| H | -14.69794600 | 28.76401700 | 16.02942100 |
| H | -14.32916800 | 27.61208500 | 14.84398600 |
| H | -19.80613400 | 32.82657600 | 16.13316100 |
| H | -4.54754400  | 28.29840300 | 15.27374800 |
| H | -8.07393600  | 31.08098900 | 17.12463600 |
| H | -7.76758800  | 32.59860800 | 12.92700000 |
| H | -16.42594500 | 30.88237800 | 22.70813300 |
| H | -17.99792700 | 31.60291800 | 22.45195100 |
| H | -16.36008600 | 28.18771100 | 22.45608700 |

---

|   |              |             |             |
|---|--------------|-------------|-------------|
| H | -19.22734300 | 30.79301300 | 20.58444700 |
| H | -16.68954900 | 26.53884100 | 20.63198300 |
| H | -19.56759700 | 29.12708500 | 18.78605800 |
| H | -18.91628000 | 27.08541500 | 17.94302800 |
| H | -17.86466100 | 29.19928800 | 24.32392700 |
| H | -12.74678400 | 21.28257300 | 11.33949200 |
| H | -10.15755700 | 24.88866600 | 12.23308600 |
| H | -9.93665000  | 26.52588300 | 8.08432100  |
| H | -6.11163400  | 28.72130100 | 8.54279200  |
| H | -19.60555400 | 24.82089900 | 11.15744400 |
| H | -21.08803300 | 25.34851500 | 13.13321700 |
| H | -21.73884900 | 24.06428600 | 12.08720700 |
| H | -20.97648500 | 23.65469600 | 13.63292000 |
| H | -18.84100100 | 25.10134000 | 13.62970500 |
| H | -20.19161000 | 22.32530300 | 11.12739400 |
| H | -22.33100700 | 26.54371500 | 17.47169700 |
| H | -22.73145200 | 26.41542100 | 15.76690700 |
| H | -20.89030600 | 24.57524200 | 15.62109500 |
| H | -20.44362700 | 25.03542300 | 17.26598500 |
| H | -22.77167700 | 23.95108500 | 17.60399500 |
| H | -15.41141800 | 30.20928100 | 20.47469900 |
| H | -13.87739800 | 30.85017400 | 19.82332800 |
| H | -15.41708000 | 28.37297200 | 18.83608600 |
| H | -13.46344500 | 28.44407800 | 20.87300000 |
| H | -13.15993500 | 26.19327400 | 19.92624100 |
| H | -11.74076400 | 29.20089900 | 19.32595200 |
| H | -10.56535600 | 27.19588300 | 18.82341800 |
| H | -12.99206200 | 27.27141200 | 17.29814700 |
| H | -11.02019700 | 30.57815800 | 17.57398500 |
| H | -8.30437300  | 29.69505900 | 13.55056100 |
| H | -12.08402700 | 26.11130100 | 13.05152600 |
| H | -21.37885100 | 32.59099700 | 9.44250000  |
| H | -20.12910700 | 33.80541800 | 9.13373400  |
| H | -19.66878800 | 32.12570100 | 9.42474900  |
| H | -23.10842400 | 35.26610700 | 11.45208000 |
| H | -22.40896600 | 34.71029000 | 9.93055600  |
| H | -23.02531400 | 33.54723000 | 11.09685500 |
| H | -20.44697300 | 34.25156000 | 13.79366500 |
| H | -22.03060800 | 33.52043400 | 13.50647200 |
| H | -20.25737100 | 36.31330500 | 12.29635700 |
| H | -20.72838400 | 35.83614100 | 9.35179600  |
| H | -19.44467400 | 36.91195100 | 9.83515000  |
| H | -20.91503000 | 38.43194500 | 10.96117800 |
| H | -22.17336900 | 37.23489900 | 11.16263300 |

---

|   |              |             |             |
|---|--------------|-------------|-------------|
| H | -16.82412400 | 37.51697100 | 12.72221400 |
| H | -18.54337600 | 37.27457900 | 12.85564800 |
| H | -17.84522200 | 37.72774700 | 11.30622200 |
| H | -13.66211700 | 37.21275000 | 11.28161500 |
| H | -14.88690300 | 36.66771000 | 10.12513600 |
| H | -15.32970700 | 37.71530900 | 11.46786000 |
| H | -15.44853400 | 36.74629800 | 13.90019400 |
| H | -13.73637500 | 36.34315000 | 13.72866400 |
| H | -13.33038400 | 34.25171700 | 12.59190700 |
| H | -13.49258000 | 34.86509700 | 9.59650800  |
| H | -12.33752100 | 33.80406900 | 10.40532600 |
| H | -13.29393300 | 31.92039500 | 11.13828100 |
| H | -13.11682400 | 28.58157500 | 9.30145500  |
| H | -12.68211900 | 30.23548200 | 9.73144100  |
| H | -14.02995000 | 29.94423900 | 8.62534700  |
| H | -13.27675400 | 28.02022900 | 11.78321300 |
| H | -14.29823100 | 28.99224900 | 12.85915900 |
| H | -12.81821500 | 29.68445900 | 12.17268300 |
| H | -15.59846600 | 27.68668500 | 11.17867800 |
| H | -16.14536500 | 28.88503200 | 8.40435300  |
| H | -16.87537200 | 27.42814700 | 9.09259400  |
| H | -18.90998800 | 27.16378200 | 12.30510000 |
| H | -18.93426700 | 27.13364100 | 10.54462500 |
| H | -17.43150300 | 26.90505000 | 11.43486500 |
| H | -21.56697500 | 28.94896700 | 14.04996100 |
| H | -19.90077000 | 28.41107900 | 13.91126000 |
| H | -20.24719600 | 30.11508700 | 14.22884800 |
| H | -22.36669200 | 28.38445900 | 11.57552300 |
| H | -20.95318300 | 27.37080000 | 11.77782700 |
| H | -21.64542700 | 30.77882300 | 10.75490200 |
| H | -23.33871700 | 30.15193400 | 12.53404500 |
| H | -23.25243500 | 31.88596500 | 12.25339400 |
| H | -18.37425900 | 32.40589000 | 14.15941200 |
| H | -17.58496800 | 30.76174200 | 13.78972700 |
| H | -16.54285700 | 32.22637800 | 14.21403000 |
| H | -14.23966500 | 24.47587700 | 23.83698900 |
| H | -12.74550600 | 27.11379800 | 24.29139600 |
| H | -14.42760400 | 26.53724800 | 22.11309500 |
| H | -11.71459000 | 26.68245600 | 22.03644500 |
| H | -11.23321800 | 25.44259800 | 23.21182600 |
| H | -12.47636400 | 25.07648900 | 22.01362500 |
| H | -14.66974500 | 25.01559500 | 12.11896000 |
| H | -16.24605500 | 24.87929100 | 12.28137000 |
| H | -21.98169300 | 38.01292400 | 9.62775700  |

---

|   |              |             |             |
|---|--------------|-------------|-------------|
| H | -21.84990100 | 35.26748100 | 13.56725700 |
| H | -15.14134200 | 27.46140100 | 8.75409100  |
| H | -21.10309400 | 28.39972600 | 10.34315000 |
| H | -23.47145100 | 24.08659100 | 15.99039600 |
| H | -24.21110600 | 24.92060000 | 17.36835400 |
| H | -18.86647500 | 30.65213900 | 24.47491900 |
| H | -17.11637900 | 30.70407900 | 24.84487000 |
| H | -14.41293400 | 25.52111700 | 25.25445800 |
| H | -12.89467200 | 24.67216400 | 24.96925200 |
| H | -4.40180900  | 28.34687700 | 17.04161500 |
| H | -6.84073000  | 32.23240400 | 17.70290400 |
| H | -8.30677400  | 34.09230600 | 13.68539400 |
| H | -8.63746000  | 28.83026900 | 12.07220100 |
| H | -9.03190300  | 31.69500500 | 15.23527200 |
| H | -5.19459200  | 30.65168400 | 17.34698400 |
| H | -5.66488500  | 27.30732900 | 7.56716900  |
| H | -6.28902200  | 28.77003200 | 6.77864600  |
| H | -8.10808000  | 27.04122000 | 7.13483200  |
| H | -10.15079600 | 26.77985900 | 11.04318600 |
| H | -10.67775100 | 22.32044600 | 10.87614000 |
| H | -8.96441400  | 23.74264600 | 11.58994500 |
| H | -19.12627900 | 22.14147500 | 12.54243000 |
| H | -18.47644000 | 22.68896100 | 10.97727600 |
| H | -13.71732300 | 22.34624100 | 10.28646800 |
| H | -5.60141000  | 27.28996000 | 16.26250100 |
| H | -22.48441700 | 31.18738300 | 13.68127800 |
| H | -21.83787500 | 32.35138200 | 16.93375500 |
| H | -18.37565300 | 34.56845000 | 18.02640100 |
| H | -14.90688300 | 35.08760000 | 14.17624000 |
| H | -9.49292500  | 32.83136000 | 13.29747200 |
| H | -13.97947300 | 22.37741100 | 12.03786700 |
| H | -12.30524500 | 35.53340800 | 10.73241900 |
| H | -10.52095400 | 27.96239400 | 8.95327500  |
| H | -20.25493100 | 32.13679600 | 13.08927500 |
| C | -19.30586900 | 36.72582800 | 17.01983600 |
| C | -19.78732300 | 35.31743900 | 16.73519500 |
| O | -20.77998000 | 35.06613100 | 16.05760600 |
| N | -19.00052000 | 34.33405400 | 17.26680600 |
| C | -20.30562000 | 32.52541000 | 18.25076400 |
| O | -19.90916400 | 32.57865000 | 19.41216200 |
| N | -21.56295200 | 32.15482600 | 17.88598600 |
| C | -22.61788900 | 31.96693400 | 18.88106200 |
| H | -18.21749900 | 36.80575100 | 16.94516200 |
| H | -19.77644900 | 37.41060800 | 16.31392700 |

---

|   |              |             |             |
|---|--------------|-------------|-------------|
| H | -19.59923000 | 37.02399000 | 18.03281400 |
| H | -22.13745100 | 31.93048200 | 19.85923400 |
| H | -23.31324600 | 32.81392700 | 18.86800700 |
| H | -23.18864400 | 31.04874100 | 18.74208100 |

---

| <b>Prod</b> |              |             |             |
|-------------|--------------|-------------|-------------|
| C           | -15.01888600 | 30.32914100 | 19.47257300 |
| C           | -14.65325400 | 28.97969400 | 18.88546700 |
| O           | -13.92762900 | 29.22420500 | 17.62507300 |
| C           | -13.70206800 | 28.12897500 | 19.76049600 |
| O           | -14.11797500 | 26.76813700 | 19.73388200 |
| C           | -12.35321300 | 28.27605900 | 19.03285700 |
| O           | -11.52078800 | 27.18278600 | 19.34639900 |
| C           | -12.82227700 | 28.33561900 | 17.56931400 |
| N           | -11.84982400 | 28.81896800 | 16.61187600 |
| C           | -11.02744000 | 29.93036000 | 16.71457200 |
| N           | -10.23124100 | 30.08510100 | 15.68542400 |
| C           | -10.53318700 | 29.02857400 | 14.83576600 |
| C           | -10.01490900 | 28.61032300 | 13.57721400 |
| N           | -8.97138400  | 29.20840100 | 12.97903400 |
| N           | -10.64111700 | 27.57501400 | 12.95935000 |
| C           | -11.66888600 | 26.96228500 | 13.57285100 |
| N           | -12.18231400 | 27.22024100 | 14.78400500 |
| C           | -11.56557800 | 28.25654800 | 15.37314900 |
| Co          | -17.67249600 | 32.30286400 | 11.37498100 |
| N           | -19.00076700 | 33.62902700 | 11.40537000 |
| N           | -16.31164600 | 33.66761000 | 11.35092000 |
| N           | -16.50875500 | 30.79263600 | 11.09430400 |
| N           | -19.10896700 | 31.15043700 | 11.70395000 |
| C           | -20.40233900 | 33.14084600 | 11.29534200 |
| C           | -20.68332400 | 32.81926100 | 9.81557500  |
| C           | -21.24010200 | 34.35140500 | 11.85330300 |
| C           | -22.66403400 | 34.44770700 | 11.29018700 |
| C           | -21.32948800 | 34.31384000 | 13.38941600 |
| C           | -20.30804600 | 35.56435200 | 11.48809300 |
| C           | -20.60468900 | 36.33075600 | 10.16237200 |
| C           | -21.41487400 | 37.59501700 | 10.46023300 |
| C           | -18.93517900 | 34.92445700 | 11.51633200 |
| C           | -17.70866700 | 35.66103100 | 11.66947100 |
| C           | -17.88218900 | 37.13938000 | 11.96584300 |
| C           | -16.48354800 | 35.03712300 | 11.57392800 |
| C           | -15.11845600 | 35.74988000 | 11.58668600 |
| C           | -15.01892700 | 36.66434700 | 10.34308000 |
| C           | -14.80676300 | 36.54036000 | 12.87625400 |
| C           | -14.12465400 | 34.55049200 | 11.51643500 |
| C           | -12.96792700 | 34.68703500 | 10.53883600 |
| C           | -15.00170900 | 33.35775400 | 11.25325800 |
| C           | -14.47642800 | 32.09879500 | 10.99384600 |
| C           | -15.18271900 | 30.90277400 | 10.89777400 |



---

|   |              |             |             |
|---|--------------|-------------|-------------|
| C | -14.50445500 | 29.55592300 | 10.68882500 |
| C | -13.52780800 | 29.56653600 | 9.50064900  |
| C | -13.72665800 | 29.19151700 | 11.97359900 |
| C | -15.73004000 | 28.59837200 | 10.53701000 |
| C | -15.98496600 | 28.06011200 | 9.10498400  |
| C | -16.89323200 | 29.45152600 | 11.04259100 |
| C | -18.12761700 | 28.96116300 | 11.41001100 |
| C | -18.33438500 | 27.46282800 | 11.47298500 |
| C | -19.21845800 | 29.84892700 | 11.75100100 |
| C | -20.62011800 | 29.44926000 | 12.24052600 |
| C | -20.53111400 | 29.07624000 | 13.73459400 |
| C | -21.28291900 | 28.34610400 | 11.42207000 |
| C | -21.42491300 | 30.77148800 | 12.01357500 |
| C | -22.64263000 | 30.94463600 | 12.92015400 |
| C | -20.34605800 | 31.84271900 | 12.13339200 |
| C | -17.08525200 | 30.82851300 | 14.65425200 |
| C | -19.29370200 | 32.91306200 | 17.21847700 |
| C | -18.00654000 | 32.09164100 | 17.36454500 |
| C | -18.17078900 | 30.61148400 | 16.96430200 |
| C | -17.06011200 | 30.12433300 | 16.02337500 |
| N | -17.21322800 | 28.67141100 | 15.85746600 |
| C | -16.30973600 | 27.89850200 | 15.23203000 |
| N | -15.03301700 | 28.34080000 | 15.09003200 |
| N | -16.66682100 | 26.72124900 | 14.74131300 |
| C | -5.10613700  | 28.26182000 | 16.21419200 |
| C | -6.21273600  | 29.33466500 | 16.14809100 |
| O | -7.19294800  | 29.16806800 | 15.41964600 |
| N | -6.08971800  | 30.45137600 | 16.92714500 |
| C | -7.09803600  | 31.52497200 | 16.91202500 |
| C | -7.11076700  | 32.29653400 | 15.56650300 |
| O | -6.09061900  | 32.81578500 | 15.13222100 |
| N | -8.32882700  | 32.37963500 | 14.96050400 |
| C | -8.47619900  | 33.01599900 | 13.65200500 |
| C | -17.87842100 | 30.28491500 | 24.18707000 |
| C | -17.51772700 | 30.62390600 | 22.71878700 |
| C | -17.85975800 | 29.54940300 | 21.70732200 |
| C | -17.11366000 | 28.35736800 | 21.67036500 |
| C | -18.87502200 | 29.71719900 | 20.75983400 |
| C | -17.34743500 | 27.38548300 | 20.70157100 |
| C | -19.13607000 | 28.73883700 | 19.79570700 |
| C | -18.35732700 | 27.57278800 | 19.74450100 |
| O | -18.52994600 | 26.61597900 | 18.80038800 |
| C | -13.71985000 | 25.19939400 | 24.47678300 |
| C | -13.19912800 | 26.34740000 | 23.59917400 |

---

|   |              |             |             |
|---|--------------|-------------|-------------|
| O | -14.24699800 | 27.02636500 | 22.89399200 |
| C | -12.12773900 | 25.85771100 | 22.62030700 |
| C | -13.22509500 | 22.26113900 | 11.26001300 |
| C | -12.27872000 | 23.43649000 | 11.45361200 |
| O | -12.72689400 | 24.55091400 | 11.75567500 |
| N | -10.94998300 | 23.18817000 | 11.31527500 |
| C | -9.92396400  | 24.22796000 | 11.39695800 |
| C | -9.80547800  | 24.98550100 | 10.06744000 |
| O | -9.56294600  | 24.37543700 | 9.02918700  |
| N | -10.00100100 | 26.32719800 | 10.13892300 |
| C | -9.78104200  | 27.15301600 | 8.96405700  |
| C | -8.40202300  | 27.78794100 | 8.99924500  |
| O | -7.98664100  | 28.38448800 | 9.99394000  |
| N | -7.72111800  | 27.65101700 | 7.83882000  |
| C | -6.37598500  | 28.13603100 | 7.66102000  |
| C | -19.32883500 | 22.74694900 | 11.65430200 |
| C | -19.56987300 | 24.19344400 | 12.05217500 |
| O | -18.45098700 | 24.61251900 | 12.84179400 |
| C | -20.90595100 | 24.35252700 | 12.78046000 |
| C | -23.26190000 | 24.64410500 | 16.90954500 |
| C | -22.31626300 | 25.83630900 | 16.67069500 |
| C | -20.88002300 | 25.35475900 | 16.37607500 |
| C | -19.93154400 | 26.43207500 | 15.85788100 |
| O | -19.73156100 | 27.46936500 | 16.55893300 |
| O | -19.35710500 | 26.24476600 | 14.73770800 |
| O | -15.51369800 | 25.53491700 | 12.45568800 |
| H | -17.68586100 | 32.16301000 | 18.40961300 |
| H | -17.23832500 | 32.57873600 | 16.75422100 |
| H | -19.13904800 | 30.44393100 | 16.47461000 |
| H | -18.17824000 | 29.98220900 | 17.85688100 |
| H | -15.56337900 | 30.92703500 | 18.73735100 |
| H | -16.09774200 | 30.32570000 | 16.51069900 |
| H | -18.15346300 | 28.26803600 | 16.02198500 |
| H | -17.67896300 | 26.52403700 | 14.69122300 |
| H | -16.03739900 | 26.20986400 | 14.11723800 |
| H | -14.69988400 | 28.94406700 | 15.83831100 |
| H | -14.33280700 | 27.65965500 | 14.80300400 |
| H | -19.73279800 | 32.75718700 | 16.22768400 |
| H | -4.54754900  | 28.29428000 | 15.27367000 |
| H | -8.07428400  | 31.08192300 | 17.12574900 |
| H | -7.76657000  | 32.59769700 | 12.92866500 |
| H | -16.43496200 | 30.80294700 | 22.66849500 |
| H | -17.99123200 | 31.56764000 | 22.42535800 |
| H | -16.31779300 | 28.19762800 | 22.39507000 |

---

|   |              |             |             |
|---|--------------|-------------|-------------|
| H | -19.45955300 | 30.63232300 | 20.75267100 |
| H | -16.74097000 | 26.48775600 | 20.64294500 |
| H | -19.93349800 | 28.87626100 | 19.06978400 |
| H | -19.10687300 | 26.96148600 | 18.08023400 |
| H | -17.87485000 | 29.20165500 | 24.34405400 |
| H | -12.74572900 | 21.28322900 | 11.34016900 |
| H | -10.16045300 | 24.88925600 | 12.23234400 |
| H | -9.93642000  | 26.52580100 | 8.08441000  |
| H | -6.11209900  | 28.72148300 | 8.54283400  |
| H | -19.60428100 | 24.81545400 | 11.14158100 |
| H | -21.05240000 | 25.37487700 | 13.13532900 |
| H | -21.72889000 | 24.08760000 | 12.10894800 |
| H | -20.94866200 | 23.68544300 | 13.64779200 |
| H | -18.80778400 | 25.08359900 | 13.62404200 |
| H | -20.19377400 | 22.32615900 | 11.12976900 |
| H | -22.29446300 | 26.50203400 | 17.53998700 |
| H | -22.68520500 | 26.43820900 | 15.82959500 |
| H | -20.89844000 | 24.53772100 | 15.65207000 |
| H | -20.44337200 | 24.96109600 | 17.30345900 |
| H | -22.79207700 | 23.91944300 | 17.58575100 |
| H | -15.66571100 | 30.18841500 | 20.34045100 |
| H | -14.12251800 | 30.88293600 | 19.77090300 |
| H | -15.54617300 | 28.38743300 | 18.66315600 |
| H | -13.66267300 | 28.48730000 | 20.79576200 |
| H | -13.31789900 | 26.23432900 | 19.86142700 |
| H | -11.89334300 | 29.23658900 | 19.30605900 |
| H | -10.71159900 | 27.22877400 | 18.82072900 |
| H | -13.11690100 | 27.33214600 | 17.23783200 |
| H | -11.07789100 | 30.59307000 | 17.56673400 |
| H | -8.30380400  | 29.67613900 | 13.58373100 |
| H | -12.13018500 | 26.15378000 | 13.01271000 |
| H | -21.71569000 | 32.49971500 | 9.66051400  |
| H | -20.49779500 | 33.69245300 | 9.18857500  |
| H | -20.02150300 | 32.01735800 | 9.47626100  |
| H | -23.18994500 | 35.29504800 | 11.73910800 |
| H | -22.70079100 | 34.57050200 | 10.20693400 |
| H | -23.23457600 | 33.54801100 | 11.53524200 |
| H | -20.34792400 | 34.24269100 | 13.86330500 |
| H | -21.93763100 | 33.48193300 | 13.75058100 |
| H | -20.36780800 | 36.29972700 | 12.29643400 |
| H | -21.14401600 | 35.68548600 | 9.46695300  |
| H | -19.66813800 | 36.58852300 | 9.65585600  |
| H | -20.77071800 | 38.38769800 | 10.85649200 |
| H | -22.16020300 | 37.38617700 | 11.23615600 |

---

|   |              |             |             |
|---|--------------|-------------|-------------|
| H | -16.94985900 | 37.69008800 | 11.98425100 |
| H | -18.35930400 | 37.28446300 | 12.94267600 |
| H | -18.52041000 | 37.62744900 | 11.22505000 |
| H | -14.03630800 | 37.13983800 | 10.28793400 |
| H | -15.17971100 | 36.09966200 | 9.42044600  |
| H | -15.76563000 | 37.45812700 | 10.37361200 |
| H | -15.36003100 | 37.47515500 | 12.96438500 |
| H | -13.74114900 | 36.79469000 | 12.88650500 |
| H | -13.69672700 | 34.40125400 | 12.51812700 |
| H | -13.30739600 | 34.71738000 | 9.50095800  |
| H | -12.27273900 | 33.84869400 | 10.63580100 |
| H | -13.40023300 | 32.03003900 | 10.90525500 |
| H | -13.10231400 | 28.56814100 | 9.35848200  |
| H | -12.69520100 | 30.24971300 | 9.69339000  |
| H | -14.00613300 | 29.87458200 | 8.56787100  |
| H | -13.28679500 | 28.19746300 | 11.85951700 |
| H | -14.38435800 | 29.17405300 | 12.84609100 |
| H | -12.91489500 | 29.90034200 | 12.16566200 |
| H | -15.58844400 | 27.73034600 | 11.18887200 |
| H | -16.15644100 | 28.87278700 | 8.39225100  |
| H | -16.86688900 | 27.41570600 | 9.09998900  |
| H | -18.86217300 | 27.16567500 | 12.37833400 |
| H | -18.90685200 | 27.08620300 | 10.61897500 |
| H | -17.39018300 | 26.92422700 | 11.49818000 |
| H | -21.50279100 | 28.73564500 | 14.10330500 |
| H | -19.82328700 | 28.26837200 | 13.91073000 |
| H | -20.22733700 | 29.93164700 | 14.34549900 |
| H | -22.36372500 | 28.36548200 | 11.59881700 |
| H | -20.93991300 | 27.34735700 | 11.69081900 |
| H | -21.76881400 | 30.74841700 | 10.97312000 |
| H | -23.29252400 | 30.06586300 | 12.87102800 |
| H | -23.24236500 | 31.80634600 | 12.61952000 |
| H | -16.92669500 | 31.90687100 | 14.75568100 |
| H | -18.04896100 | 30.66738400 | 14.16608300 |
| H | -16.30621800 | 30.43785300 | 13.99595500 |
| H | -14.23263400 | 24.45569100 | 23.85441600 |
| H | -12.76274400 | 27.11787100 | 24.24694800 |
| H | -14.49168800 | 26.50551700 | 22.11441100 |
| H | -11.78050300 | 26.67018900 | 21.97573600 |
| H | -11.26503500 | 25.43960600 | 23.14858900 |
| H | -12.53468400 | 25.06176400 | 21.98131000 |
| H | -14.71743200 | 25.03678100 | 12.19617200 |
| H | -16.29459900 | 24.96096500 | 12.36272500 |
| H | -21.98180000 | 38.01281100 | 9.62768000  |

---

|   |              |             |             |
|---|--------------|-------------|-------------|
| H | -21.78612000 | 35.23055500 | 13.76857200 |
| H | -15.13336500 | 27.46843700 | 8.76166900  |
| H | -21.12062000 | 28.49037200 | 10.34880700 |
| H | -23.47300300 | 24.11926400 | 15.97150700 |
| H | -24.21104300 | 24.92065500 | 17.36820700 |
| H | -18.86359300 | 30.66317200 | 24.47217900 |
| H | -17.11633900 | 30.70407700 | 24.84480300 |
| H | -14.41287400 | 25.52107500 | 25.25452700 |
| H | -12.88094500 | 24.69520700 | 24.96981500 |
| H | -4.40178400  | 28.34688300 | 17.04160800 |
| H | -6.84005200  | 32.23344700 | 17.70174000 |
| H | -8.30673500  | 34.09230800 | 13.68539500 |
| H | -8.63676900  | 28.82902000 | 12.09514100 |
| H | -9.03637700  | 31.69968600 | 15.23856200 |
| H | -5.19898500  | 30.64654600 | 17.35873200 |
| H | -5.66443300  | 27.30768500 | 7.56745300  |
| H | -6.28902200  | 28.77002300 | 6.77863800  |
| H | -8.10605000  | 27.03711800 | 7.13679400  |
| H | -10.15576800 | 26.78165500 | 11.04194100 |
| H | -10.67818900 | 22.32079700 | 10.87583400 |
| H | -8.96482600  | 23.74295300 | 11.59242400 |
| H | -19.12591700 | 22.14464700 | 12.54442500 |
| H | -18.47631100 | 22.68916900 | 10.97743800 |
| H | -13.71772200 | 22.34485700 | 10.28652900 |
| H | -5.60429400  | 27.29151500 | 16.26517300 |
| H | -22.35436100 | 31.08590800 | 13.96572100 |
| H | -21.78595500 | 32.40779400 | 16.97331100 |
| H | -18.27238200 | 34.59664300 | 17.99519900 |
| H | -15.01813300 | 35.93707000 | 13.76506900 |
| H | -9.49248000  | 32.83116800 | 13.29627300 |
| H | -13.97948300 | 22.37741500 | 12.03792000 |
| H | -12.39217600 | 35.59551400 | 10.73838500 |
| H | -10.52056200 | 27.96282700 | 8.95280600  |
| H | -20.20299200 | 32.12114600 | 13.18307500 |
| C | -19.30569000 | 36.72574900 | 17.01986600 |
| C | -19.79062800 | 35.30048200 | 16.79962900 |
| O | -20.82453800 | 35.02328000 | 16.19678200 |
| N | -18.97011700 | 34.33379200 | 17.31295300 |
| C | -20.29255500 | 32.52692400 | 18.33182600 |
| O | -19.93027100 | 32.56148900 | 19.50396900 |
| N | -21.53729700 | 32.15396100 | 17.91955600 |
| C | -22.61794300 | 31.96685600 | 18.88113000 |
| H | -18.21779700 | 36.80076300 | 16.92889500 |
| H | -19.77648400 | 37.41038600 | 16.31396500 |

---

|   |              |             |             |
|---|--------------|-------------|-------------|
| H | -19.57883000 | 37.04989500 | 18.03081800 |
| H | -22.16693300 | 31.94006000 | 19.87387700 |
| H | -23.31508000 | 32.81228400 | 18.84528000 |
| H | -23.18869100 | 31.04882200 | 18.74199200 |

---

| Prod' |              |             |             |
|-------|--------------|-------------|-------------|
| C     | -14.68612400 | 30.29532500 | 19.76315600 |
| C     | -14.41289600 | 28.94799100 | 19.12351600 |
| O     | -13.77943500 | 29.18784300 | 17.81495300 |
| C     | -13.43309100 | 28.04860200 | 19.90589300 |
| O     | -13.90333700 | 26.70480500 | 19.87333700 |
| C     | -12.13305800 | 28.17017200 | 19.09299200 |
| O     | -11.32108000 | 27.04193100 | 19.32393300 |
| C     | -12.69197300 | 28.28565500 | 17.66415500 |
| N     | -11.77299800 | 28.79299800 | 16.66727300 |
| C     | -10.95818400 | 29.91099600 | 16.75485300 |
| N     | -10.19736700 | 30.08332400 | 15.70246400 |
| C     | -10.51466800 | 29.03127400 | 14.85338500 |
| C     | -10.02083500 | 28.62076000 | 13.58277300 |
| N     | -8.98859400  | 29.22378100 | 12.96930000 |
| N     | -10.65557500 | 27.58636200 | 12.97230400 |
| C     | -11.66774100 | 26.96678500 | 13.60509100 |
| N     | -12.15292100 | 27.21317900 | 14.83080300 |
| C     | -11.52480700 | 28.24602700 | 15.41343100 |
| Co    | -17.69221400 | 32.29351600 | 11.36982900 |
| N     | -19.02132400 | 33.61824900 | 11.40713700 |
| N     | -16.33033900 | 33.65736200 | 11.32490600 |
| N     | -16.52827500 | 30.78201900 | 11.09388200 |
| N     | -19.12560000 | 31.14392000 | 11.71827800 |
| C     | -20.42417000 | 33.13011500 | 11.30931700 |
| C     | -20.71666100 | 32.80511400 | 9.83260600  |
| C     | -21.25601400 | 34.34308300 | 11.87076600 |
| C     | -22.68542700 | 34.43993600 | 11.32215500 |
| C     | -21.32994200 | 34.31148500 | 13.40788800 |
| C     | -20.32714600 | 35.55417000 | 11.49243100 |
| C     | -20.63132400 | 36.31397500 | 10.16426300 |
| C     | -21.41517300 | 37.59486100 | 10.46014600 |
| C     | -18.95465100 | 34.91410500 | 11.51177800 |
| C     | -17.72708800 | 35.65147600 | 11.64671400 |
| C     | -17.89563100 | 37.13283200 | 11.92983700 |
| C     | -16.50278100 | 35.02764100 | 11.54264500 |
| C     | -15.14006500 | 35.74321900 | 11.53068500 |
| C     | -15.05395300 | 36.61864300 | 10.25784000 |
| C     | -14.81451300 | 36.57325300 | 12.79147700 |
| C     | -14.14685900 | 34.54423300 | 11.48739700 |
| C     | -12.96801300 | 34.68697800 | 10.53904100 |
| C     | -15.02005300 | 33.34836500 | 11.22066600 |
| C     | -14.49461500 | 32.08660100 | 10.97112900 |
| C     | -15.20136200 | 30.88805000 | 10.89898900 |

---

|   |              |             |             |
|---|--------------|-------------|-------------|
| C | -14.52799600 | 29.52984400 | 10.74791500 |
| C | -13.47840000 | 29.48817600 | 9.62749400  |
| C | -13.84828400 | 29.19205500 | 12.09642700 |
| C | -15.75324000 | 28.58277800 | 10.54942900 |
| C | -15.98501500 | 28.06001400 | 9.10501500  |
| C | -16.91431900 | 29.44062800 | 11.04817100 |
| C | -18.14843800 | 28.95285400 | 11.41694000 |
| C | -18.36232900 | 27.45465100 | 11.45607600 |
| C | -19.23330300 | 29.84307200 | 11.76850900 |
| C | -20.63068600 | 29.43931200 | 12.25870000 |
| C | -20.54503200 | 29.04654200 | 13.74812600 |
| C | -21.28293900 | 28.34600900 | 11.42205000 |
| C | -21.43972500 | 30.76102500 | 12.04096400 |
| C | -22.64857700 | 30.93245800 | 12.95941700 |
| C | -20.36209800 | 31.83452200 | 12.15046000 |
| C | -17.75203400 | 31.12700700 | 14.90383800 |
| C | -19.31199400 | 32.90794900 | 17.15412200 |
| C | -18.02578800 | 32.06185600 | 17.25112900 |
| C | -18.05717600 | 30.79822400 | 16.37355700 |
| C | -17.06479900 | 29.75410500 | 16.91906800 |
| N | -17.18300000 | 28.49490500 | 16.19629100 |
| C | -16.28326200 | 27.95231300 | 15.36810000 |
| N | -15.00849800 | 28.42049300 | 15.32202600 |
| N | -16.65852700 | 26.96718900 | 14.56210000 |
| C | -5.10612900  | 28.26182900 | 16.21418700 |
| C | -6.21419400  | 29.33309000 | 16.14879200 |
| O | -7.19530900  | 29.16416500 | 15.42231300 |
| N | -6.09042000  | 30.45058800 | 16.92703000 |
| C | -7.09802400  | 31.52496500 | 16.91200600 |
| C | -7.10923600  | 32.29750500 | 15.56681200 |
| O | -6.08852300  | 32.81700700 | 15.13406300 |
| N | -8.32677500  | 32.37989400 | 14.96023000 |
| C | -8.47618300  | 33.01599200 | 13.65201600 |
| C | -17.87837300 | 30.28497900 | 24.18701800 |
| C | -17.48592200 | 30.61992300 | 22.72243400 |
| C | -17.79517900 | 29.54605500 | 21.69952200 |
| C | -17.07503300 | 28.33784200 | 21.70494900 |
| C | -18.75957200 | 29.72938900 | 20.70234300 |
| C | -17.30402100 | 27.35334300 | 20.74737800 |
| C | -19.00815700 | 28.74526800 | 19.74056300 |
| C | -18.27857500 | 27.54607400 | 19.75475800 |
| O | -18.46542700 | 26.56104300 | 18.84361800 |
| C | -13.71979000 | 25.19933500 | 24.47687900 |
| C | -13.14428000 | 26.35383200 | 23.64627800 |



---

|   |              |             |             |
|---|--------------|-------------|-------------|
| O | -14.15564400 | 27.06194500 | 22.91799400 |
| C | -12.04339600 | 25.86015500 | 22.70186400 |
| C | -13.22504300 | 22.26103900 | 11.25998600 |
| C | -12.27840400 | 23.43612000 | 11.45891400 |
| O | -12.72414500 | 24.54714900 | 11.77548600 |
| N | -10.95009600 | 23.18915000 | 11.30945100 |
| C | -9.92396400  | 24.22796600 | 11.39697500 |
| C | -9.79831300  | 24.98692400 | 10.06937300 |
| O | -9.54374200  | 24.37905200 | 9.03268800  |
| N | -10.00234600 | 26.32765000 | 10.13899000 |
| C | -9.78103100  | 27.15301300 | 8.96402600  |
| C | -8.40309700  | 27.79013500 | 8.99899700  |
| O | -7.99038200  | 28.39153000 | 9.99192800  |
| N | -7.72065300  | 27.64999300 | 7.83977200  |
| C | -6.37599200  | 28.13602400 | 7.66102100  |
| C | -19.32866700 | 22.74715900 | 11.65437200 |
| C | -19.54100100 | 24.19613900 | 12.06643900 |
| O | -18.41731100 | 24.58929200 | 12.86443400 |
| C | -20.87791000 | 24.37809600 | 12.78641800 |
| C | -23.26177700 | 24.64426700 | 16.90938400 |
| C | -22.29352900 | 25.81953500 | 16.69994800 |
| C | -20.87899300 | 25.30639100 | 16.36371000 |
| C | -19.90658400 | 26.38079600 | 15.89319700 |
| O | -19.72682600 | 27.39989900 | 16.62884400 |
| O | -19.29922600 | 26.21397100 | 14.78993000 |
| O | -15.54819100 | 25.57233200 | 12.37353800 |
| H | -17.87415000 | 31.80343800 | 18.30514500 |
| H | -17.17392600 | 32.68086500 | 16.94132300 |
| H | -19.05716100 | 30.34606500 | 16.44335500 |
| H | -17.27739100 | 29.56898100 | 17.97647400 |
| H | -15.27906200 | 30.92174400 | 19.09194900 |
| H | -16.04592400 | 30.14321300 | 16.84843600 |
| H | -18.12508700 | 28.06235800 | 16.24202500 |
| H | -17.65204200 | 26.69421600 | 14.57050100 |
| H | -16.01983800 | 26.50151900 | 13.91294600 |
| H | -14.66790800 | 28.87950100 | 16.16405600 |
| H | -14.31276100 | 27.81200000 | 14.89816300 |
| H | -19.78189800 | 32.78859600 | 16.17313400 |
| H | -4.54744200  | 28.29580100 | 15.27375800 |
| H | -8.07435500  | 31.08231900 | 17.12501600 |
| H | -7.76754800  | 32.59797100 | 12.92748700 |
| H | -16.40327900 | 30.80655600 | 22.70116800 |
| H | -17.95593900 | 31.56148300 | 22.41703100 |
| H | -16.30831300 | 28.16866500 | 22.45861500 |

---

|   |              |             |             |
|---|--------------|-------------|-------------|
| H | -19.32070100 | 30.65791800 | 20.65929100 |
| H | -16.73100400 | 26.43167100 | 20.73602600 |
| H | -19.76623700 | 28.89724300 | 18.97591900 |
| H | -19.07356500 | 26.87665600 | 18.13632800 |
| H | -17.88623000 | 29.20268900 | 24.34864700 |
| H | -12.74564100 | 21.28304100 | 11.33879300 |
| H | -10.16553200 | 24.88833600 | 12.23173200 |
| H | -9.93488800  | 26.52514300 | 8.08458200  |
| H | -6.11215700  | 28.72187800 | 8.54262400  |
| H | -19.55626000 | 24.82537000 | 11.16089900 |
| H | -21.00179600 | 25.39827600 | 13.15587800 |
| H | -21.70133100 | 24.14445300 | 12.10398100 |
| H | -20.94566100 | 23.69809600 | 13.64185700 |
| H | -18.76256500 | 25.04296100 | 13.66248200 |
| H | -20.20058800 | 22.34937400 | 11.12382200 |
| H | -22.23856100 | 26.45232800 | 17.59178900 |
| H | -22.65753700 | 26.46169400 | 15.88697400 |
| H | -20.93011300 | 24.52528100 | 15.60332500 |
| H | -20.44423600 | 24.85425700 | 17.26532300 |
| H | -22.80791900 | 23.89513300 | 17.56989300 |
| H | -15.25680700 | 30.15163900 | 20.68267900 |
| H | -13.75193000 | 30.81874400 | 19.99185400 |
| H | -15.34040000 | 28.39007800 | 18.96471400 |
| H | -13.31511200 | 28.37794100 | 20.94434800 |
| H | -13.11986200 | 26.13714900 | 19.94515800 |
| H | -11.62261300 | 29.10691800 | 19.35929900 |
| H | -10.54062400 | 27.08114200 | 18.75592000 |
| H | -13.02078900 | 27.29861800 | 17.31621900 |
| H | -10.99042000 | 30.56645100 | 17.61350700 |
| H | -8.31478400  | 29.69334400 | 13.56530000 |
| H | -12.13838600 | 26.15986600 | 13.05014500 |
| H | -21.75033300 | 32.48548800 | 9.68636600  |
| H | -20.53552100 | 33.67652100 | 9.20179100  |
| H | -20.05780400 | 32.00190100 | 9.49055400  |
| H | -23.20141600 | 35.29599500 | 11.76628900 |
| H | -22.73334800 | 34.54971200 | 10.23796900 |
| H | -23.25824500 | 33.54647300 | 11.58445000 |
| H | -20.34295800 | 34.24312000 | 13.87120800 |
| H | -21.93326400 | 33.48015000 | 13.77852100 |
| H | -20.38045800 | 36.29336600 | 12.29778900 |
| H | -21.19307500 | 35.67211100 | 9.48368800  |
| H | -19.69856500 | 36.55003900 | 9.64038300  |
| H | -20.75471800 | 38.38034500 | 10.84334500 |
| H | -22.15738100 | 37.40499700 | 11.24410000 |

---

|   |              |             |             |
|---|--------------|-------------|-------------|
| H | -16.96428200 | 37.68518000 | 11.91399700 |
| H | -18.34583300 | 37.29036300 | 12.91753000 |
| H | -18.55444900 | 37.61005200 | 11.20065700 |
| H | -14.07671200 | 37.10250900 | 10.18296400 |
| H | -15.21271200 | 36.02265800 | 9.35456800  |
| H | -15.80984200 | 37.40455400 | 10.26736300 |
| H | -15.34659800 | 37.52281000 | 12.84447400 |
| H | -13.74379500 | 36.80549100 | 12.79396600 |
| H | -13.74307200 | 34.40127900 | 12.50037200 |
| H | -13.28127200 | 34.71224100 | 9.49287700  |
| H | -12.26823000 | 33.85464100 | 10.65526200 |
| H | -13.41828700 | 32.01727100 | 10.88250600 |
| H | -13.06723100 | 28.47716600 | 9.54186600  |
| H | -12.64384800 | 30.15912300 | 9.85279700  |
| H | -13.89181200 | 29.77692200 | 8.65811600  |
| H | -13.43237200 | 28.18246300 | 12.04921000 |
| H | -14.56443500 | 29.23075000 | 12.92165000 |
| H | -13.03197500 | 29.88691800 | 12.31784200 |
| H | -15.63113000 | 27.70434200 | 11.18952300 |
| H | -16.12803700 | 28.88110200 | 8.39521000  |
| H | -16.87581900 | 27.42863400 | 9.07709300  |
| H | -18.88644700 | 27.14241300 | 12.35837600 |
| H | -18.94142200 | 27.09913500 | 10.59762700 |
| H | -17.42141700 | 26.91084500 | 11.46306000 |
| H | -21.51764200 | 28.69810900 | 14.10731800 |
| H | -19.83500600 | 28.23785500 | 13.91538600 |
| H | -20.24295200 | 29.89270900 | 14.37051600 |
| H | -22.36637100 | 28.36556000 | 11.58421300 |
| H | -20.94749100 | 27.34362500 | 11.68533500 |
| H | -21.79440700 | 30.73788600 | 11.00422000 |
| H | -23.29964900 | 30.05429400 | 12.91363200 |
| H | -23.25020000 | 31.79581900 | 12.66701600 |
| H | -18.44331700 | 31.87628500 | 14.50373300 |
| H | -17.81838800 | 30.24065000 | 14.26886800 |
| H | -16.73665800 | 31.53181900 | 14.80675500 |
| H | -14.24764300 | 24.49536100 | 23.82192700 |
| H | -12.71888500 | 27.10348700 | 24.32496400 |
| H | -14.38486600 | 26.55233400 | 22.12545400 |
| H | -11.65826100 | 26.67375300 | 22.08057100 |
| H | -11.20745200 | 25.42603900 | 23.25924800 |
| H | -12.43480500 | 25.07596500 | 22.03990200 |
| H | -14.74378500 | 25.05909000 | 12.17912900 |
| H | -16.31773000 | 24.97450000 | 12.38080700 |
| H | -21.98157400 | 38.01290000 | 9.62780500  |

---

|   |              |             |             |
|---|--------------|-------------|-------------|
| H | -21.78364700 | 35.22885600 | 13.78873300 |
| H | -15.13368800 | 27.45907300 | 8.77739600  |
| H | -21.10748700 | 28.49977600 | 10.35218900 |
| H | -23.47712500 | 24.14380100 | 15.95872700 |
| H | -24.21111200 | 24.92058800 | 17.36831800 |
| H | -18.86256100 | 30.67626800 | 24.45640800 |
| H | -17.11638500 | 30.70404600 | 24.84484000 |
| H | -14.41293400 | 25.52111400 | 25.25440300 |
| H | -12.90950100 | 24.64857800 | 24.96814900 |
| H | -4.40180900  | 28.34687800 | 17.04161100 |
| H | -6.83973200  | 32.23275400 | 17.70226800 |
| H | -8.30675500  | 34.09232100 | 13.68538900 |
| H | -8.66226800  | 28.84487500 | 12.08195300 |
| H | -9.03319000  | 31.69920800 | 15.23974200 |
| H | -5.19775600  | 30.64768300 | 17.35379200 |
| H | -5.66404000  | 27.30802300 | 7.56761200  |
| H | -6.28902200  | 28.77002500 | 6.77864400  |
| H | -8.10354700  | 27.03167800 | 7.14049800  |
| H | -10.16781200 | 26.78143400 | 11.03995700 |
| H | -10.68034300 | 22.32673800 | 10.85903400 |
| H | -8.96569000  | 23.74289700 | 11.59682800 |
| H | -19.13599600 | 22.13097600 | 12.53709000 |
| H | -18.47641200 | 22.68896100 | 10.97730700 |
| H | -13.71678200 | 22.34710800 | 10.28626800 |
| H | -5.60282300  | 27.29071100 | 16.26405500 |
| H | -22.35002700 | 31.07000300 | 14.00270600 |
| H | -21.82687200 | 32.44063700 | 16.96029000 |
| H | -18.26452500 | 34.57141600 | 17.94471600 |
| H | -15.03899000 | 36.00746600 | 13.70140900 |
| H | -9.49293800  | 32.83109600 | 13.29774600 |
| H | -13.97953100 | 22.37746200 | 12.03789700 |
| H | -12.40577100 | 35.60112500 | 10.75140000 |
| H | -10.52148900 | 27.96181400 | 8.95140900  |
| H | -20.21835600 | 32.11644900 | 13.19814700 |
| C | -19.30584100 | 36.72588700 | 17.02000900 |
| C | -19.80558900 | 35.30572900 | 16.79684500 |
| O | -20.85564200 | 35.04428200 | 16.21453700 |
| N | -18.98117700 | 34.32568800 | 17.27615300 |
| C | -20.29593400 | 32.50948400 | 18.28212500 |
| O | -19.90950300 | 32.51588500 | 19.44719400 |
| N | -21.55732700 | 32.16616000 | 17.89504700 |
| C | -22.61790000 | 31.96699600 | 18.88101800 |
| H | -18.21794400 | 36.79350900 | 16.92492100 |
| H | -19.77637000 | 37.41044000 | 16.31388400 |

---

|   |              |             |             |
|---|--------------|-------------|-------------|
| H | -19.57523600 | 37.05222600 | 18.03113300 |
| H | -22.14383700 | 31.92966400 | 19.86250800 |
| H | -23.31606200 | 32.81180400 | 18.86800000 |
| H | -23.18858600 | 31.04875300 | 18.74200700 |

## S5. References

- [S1] A. D. Becke, *J. Chem. Phys.* **1993**, 98, 5648–5652.
- [S2] S. Grimme, J. Antony, S. Ehrlich and H. Krieg, *J. Chem. Phys.* **2010**, 132, 154104.
- [S3] M. J. Frisch, G. W. Trucks, H. B. Schlegel, G. E. Scuseria, M. A. Robb, J. R. Cheeseman, G. Scalmani, V. Barone, G. A. Petersson, H. Nakatsuji, X. Li, M. Caricato, A. V. Marenich, J. Bloino, B. G. Janesko, R. Gomperts, B. Mennucci, H. P. Hratchian, J. V. Ortiz, A. F. Izmaylov, J. L. Sonnenberg, Williams, F. Ding, F. Lipparini, F. Egidi, J. Goings, B. Peng, A. Petrone, T. Henderson, D. Ranasinghe, V. G. Zakrzewski, J. Gao, N. Rega, G. Zheng, W. Liang, M. Hada, M. Ehara, K. Toyota, R. Fukuda, J. Hasegawa, M. Ishida, T. Nakajima, Y. Honda, O. Kitao, H. Nakai, T. Vreven, K. Throssell, J. A. Montgomery Jr., J. E. Peralta, F. Ogliaro, M. J. Bearpark, J. J. Heyd, E. N. Brothers, K. N. Kudin, V. N. Staroverov, T. A. Keith, R. Kobayashi, J. Normand, K. Raghavachari, A. P. Rendell, J. C. Burant, S. S. Iyengar, J. Tomasi, M. Cossi, J. M. Millam, M. Klene, C. Adamo, R. Cammi, J. W. Ochterski, R. L. Martin, K. Morokuma, O. Farkas, J. B. Foresman and D. J. Fox, Gaussian 16, Revision C.01, Gaussian, Inc., Wallingford CT, **2019**.
- [S4] (a) D. Andrae, U. HauBermann, M. Dolg, H. Stoll and H. PreuB, *Theor. Chim. Acta.* **1990**, 77, 123–141; (b) M. Dolg, U. Wedig, H. Stoll and H. Preuss, *J. Chem. Phys.* **1987**, 86, 866–872; (c) J.M.L. Martin, A. Sundermann, *J. Chem. Phys.* **2001**, 114, 3408–3420. (d) <http://www.tc.uni-koeln.de/PP/clickpse.en.html> (accessed May 10th 2022)
- [S5] H. S. Yu, X. He, S. L. Li and D. G. Truhlar, *Chem. Sci.* **2016**, 7, 5032–5051.
- [S6] A. V. Marenich, C. J. Cramer and D. G. Truhlar, *J. Phys. Chem. B* **2009**, 113, 6378–6396.
- [S7] (a) J.-X. Zhang, F. K. Sheong and Z. Lin, *WIREs Comput. Mol. Sci.* **2020**, 10, e1469; (b) J.-X. Zhang, F. K. Sheong and Z. Lin, *Chem.–Eur. J.* **2018**, 24, 9639–9650.
- [S8] E. D. Glendening, C. R. Landis and F. Weinhold, *J. Comput. Chem.* **2019**, 40, 2234–2241.
